# Supplementary material for: Loss of Prm1 leads to defective chromatin protamination, impaired PRM2 processing, reduced sperm motility and subfertility in male mice
Source: PubMed Central journal article supplement (PMC9270976; doi:10.1242/dev.200330), 2022-06-17
Supplement: develop-149-200330-s1.pdf [file develop-149-200330-s1.pdf]

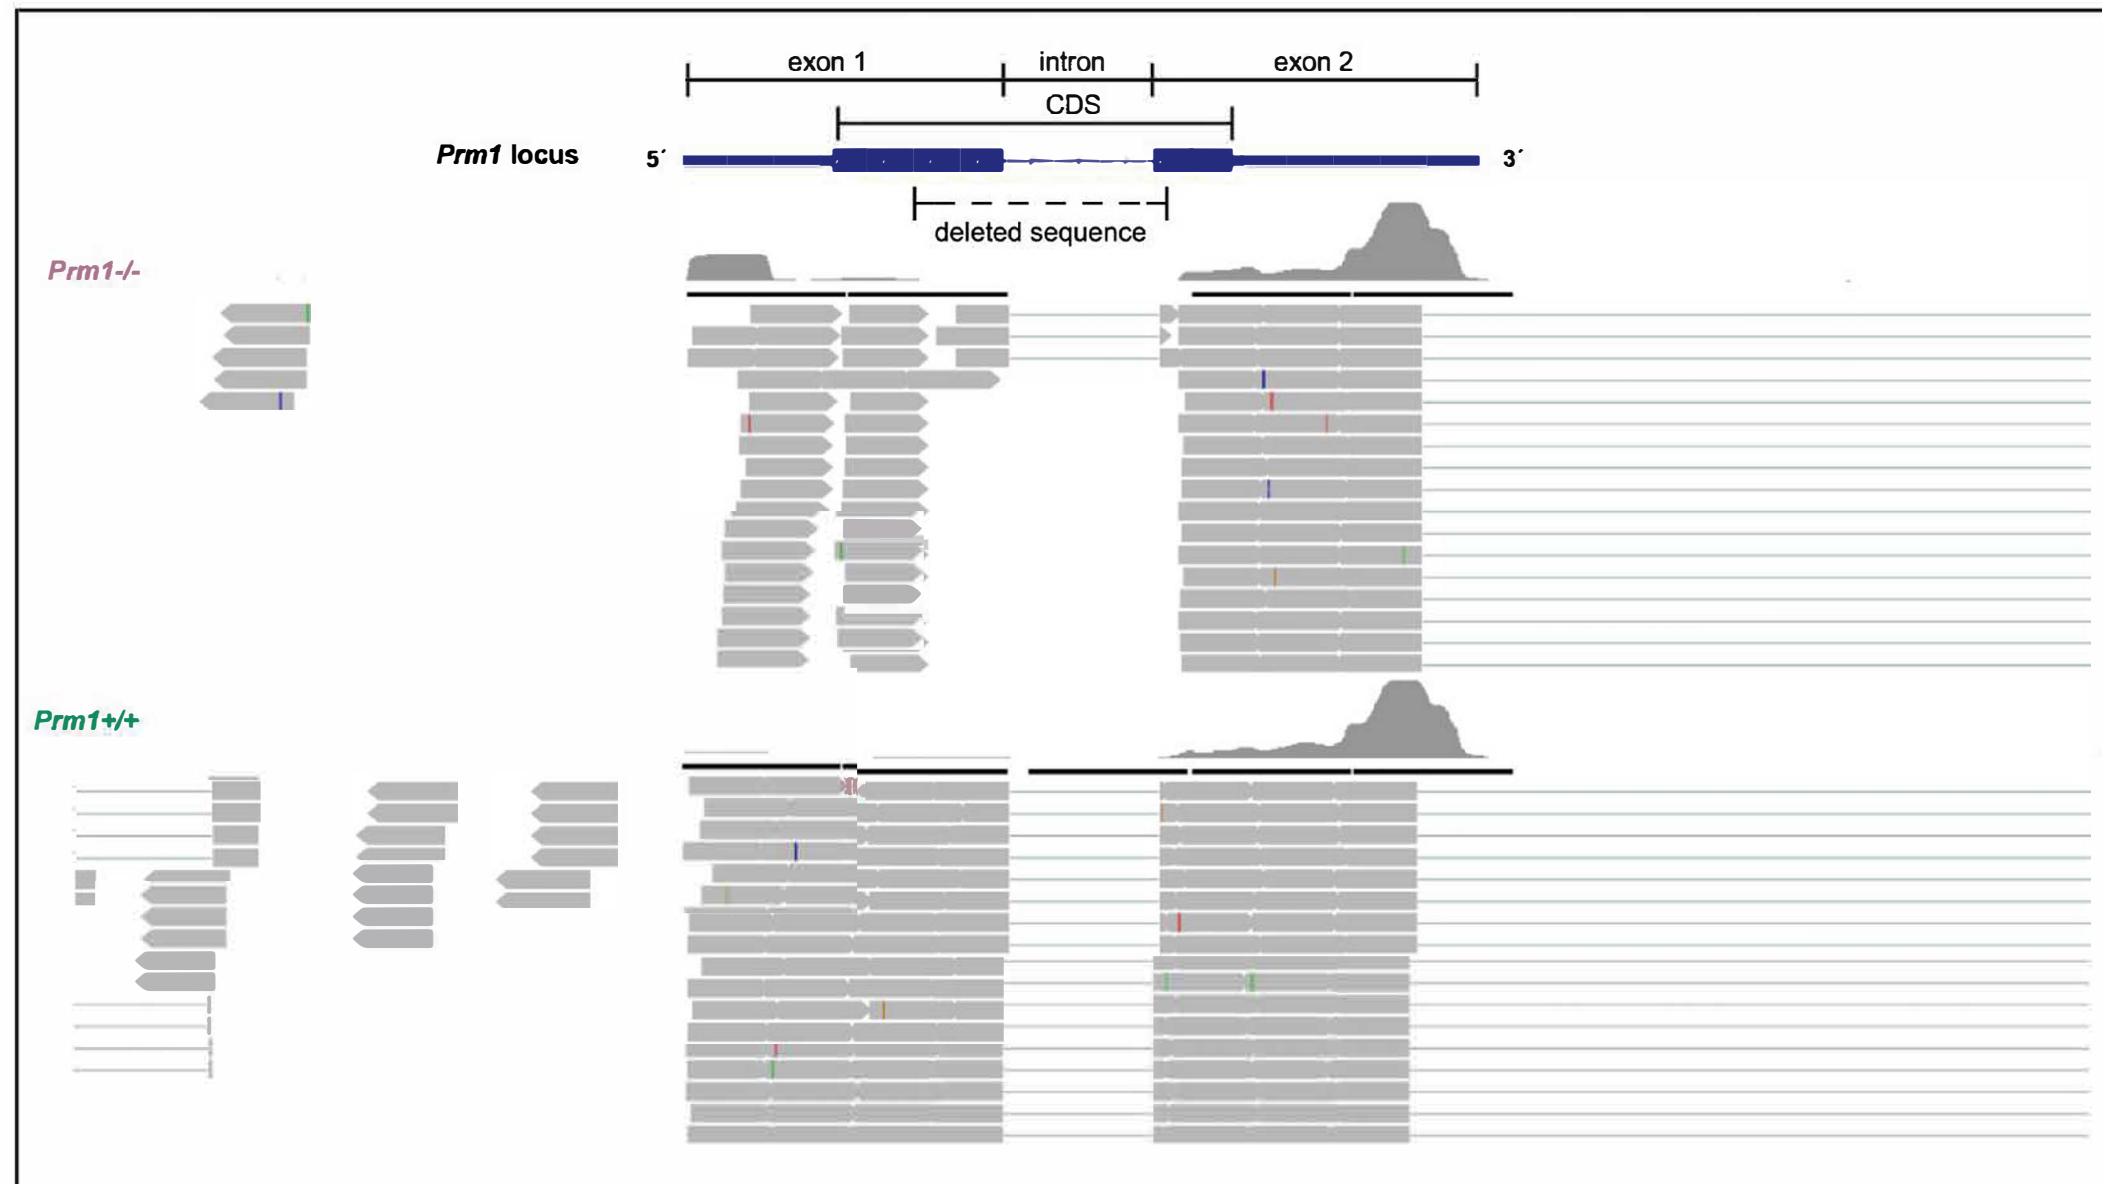

**Fig. S1. Representative cut-out of RNAseq reads mapping to the *Prm1* locus.** Reads from whole testis RNAseq of *Prm1*<sup>+/+</sup> and *Prm1*<sup>-/-</sup> mice.

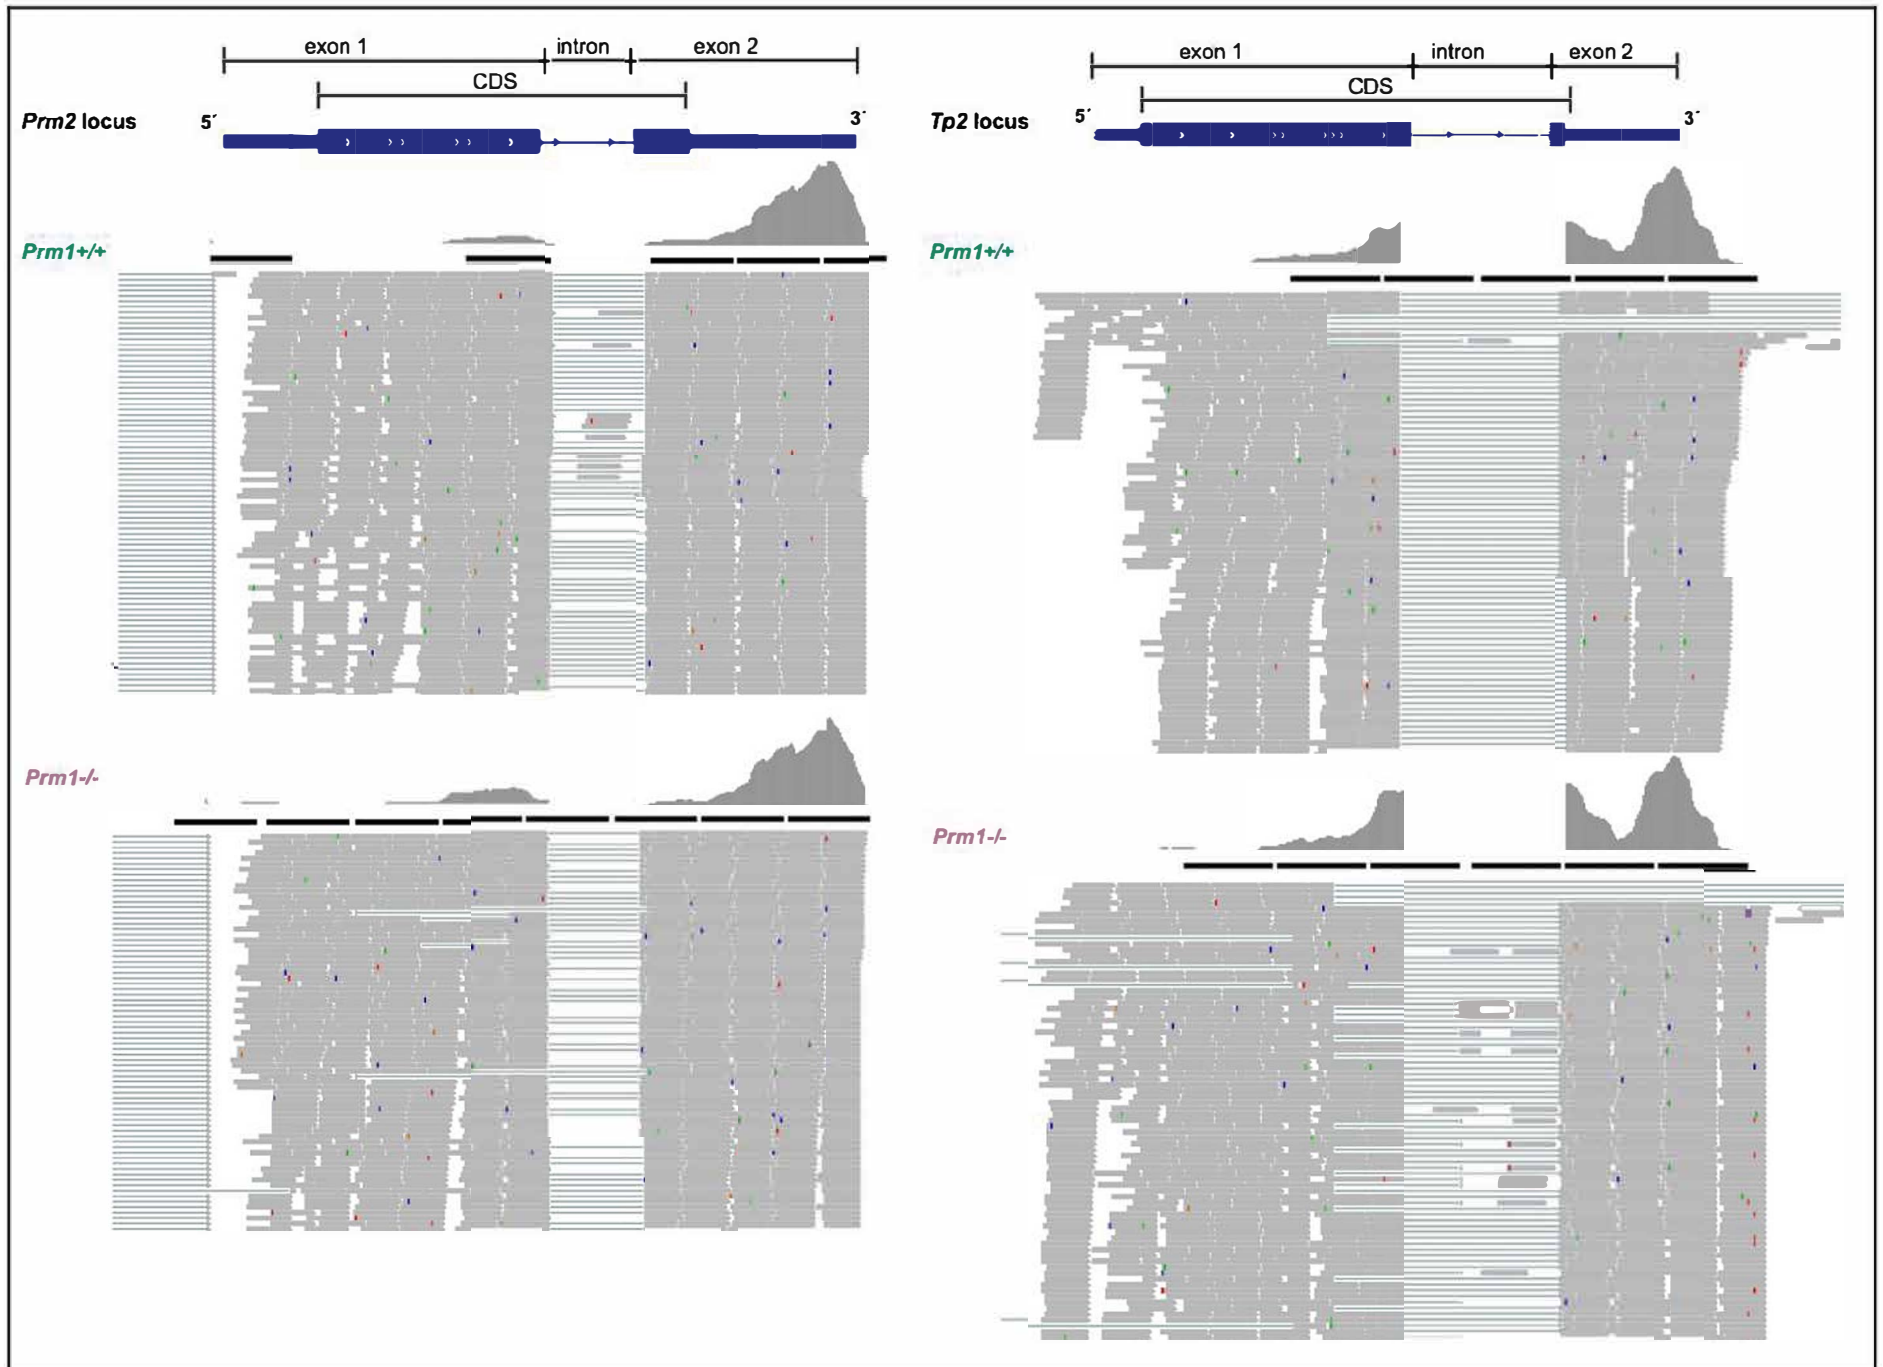

**Fig.S2..** Representative cut-out of RNAseq reads mapping to the *Prm2* and *Tp2* locus. Reads from whole testis RNAseq of *Prm1*<sup>+/+</sup> and *Prm1*<sup>-/-</sup> mice.

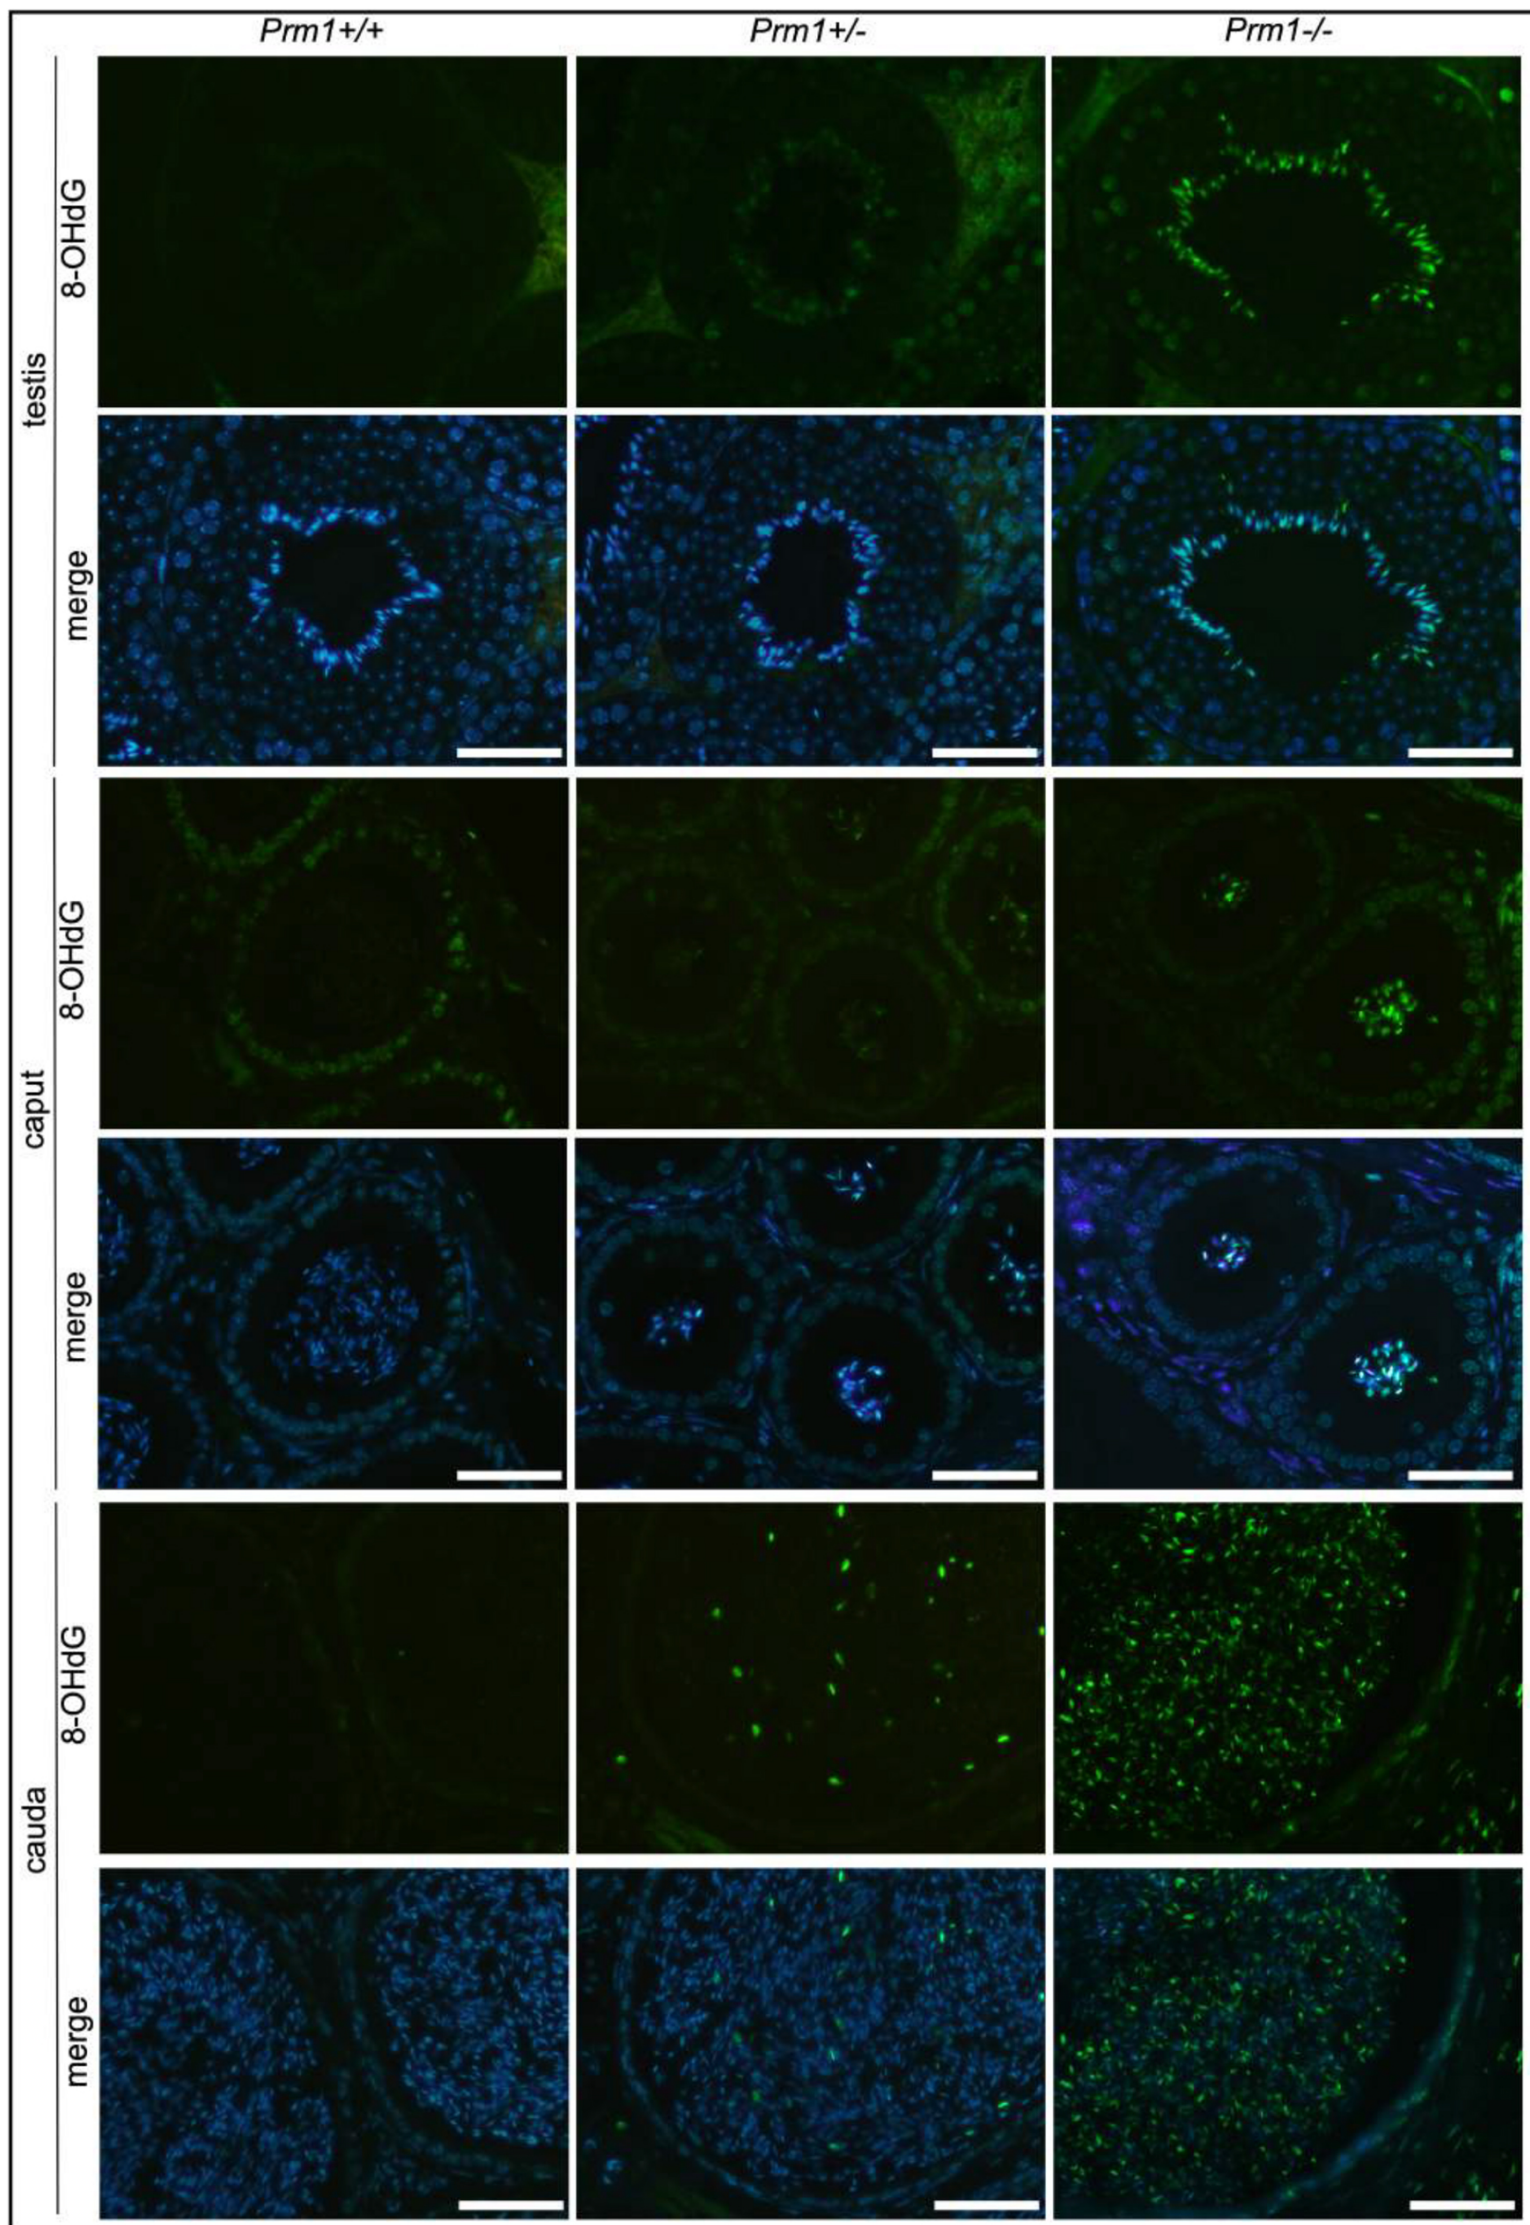

**Fig. S3. Representative immunofluorescent staining against 8-OHdG.** Testis, caput epididymis and cauda epididymis tissue sections from *Prm1*<sup>+/+</sup>, *Prm1*<sup>+/-</sup> and *Prm1*<sup>-/-</sup> males are shown. Single green and merged channels are shown. Scale: 50  $\mu$ m

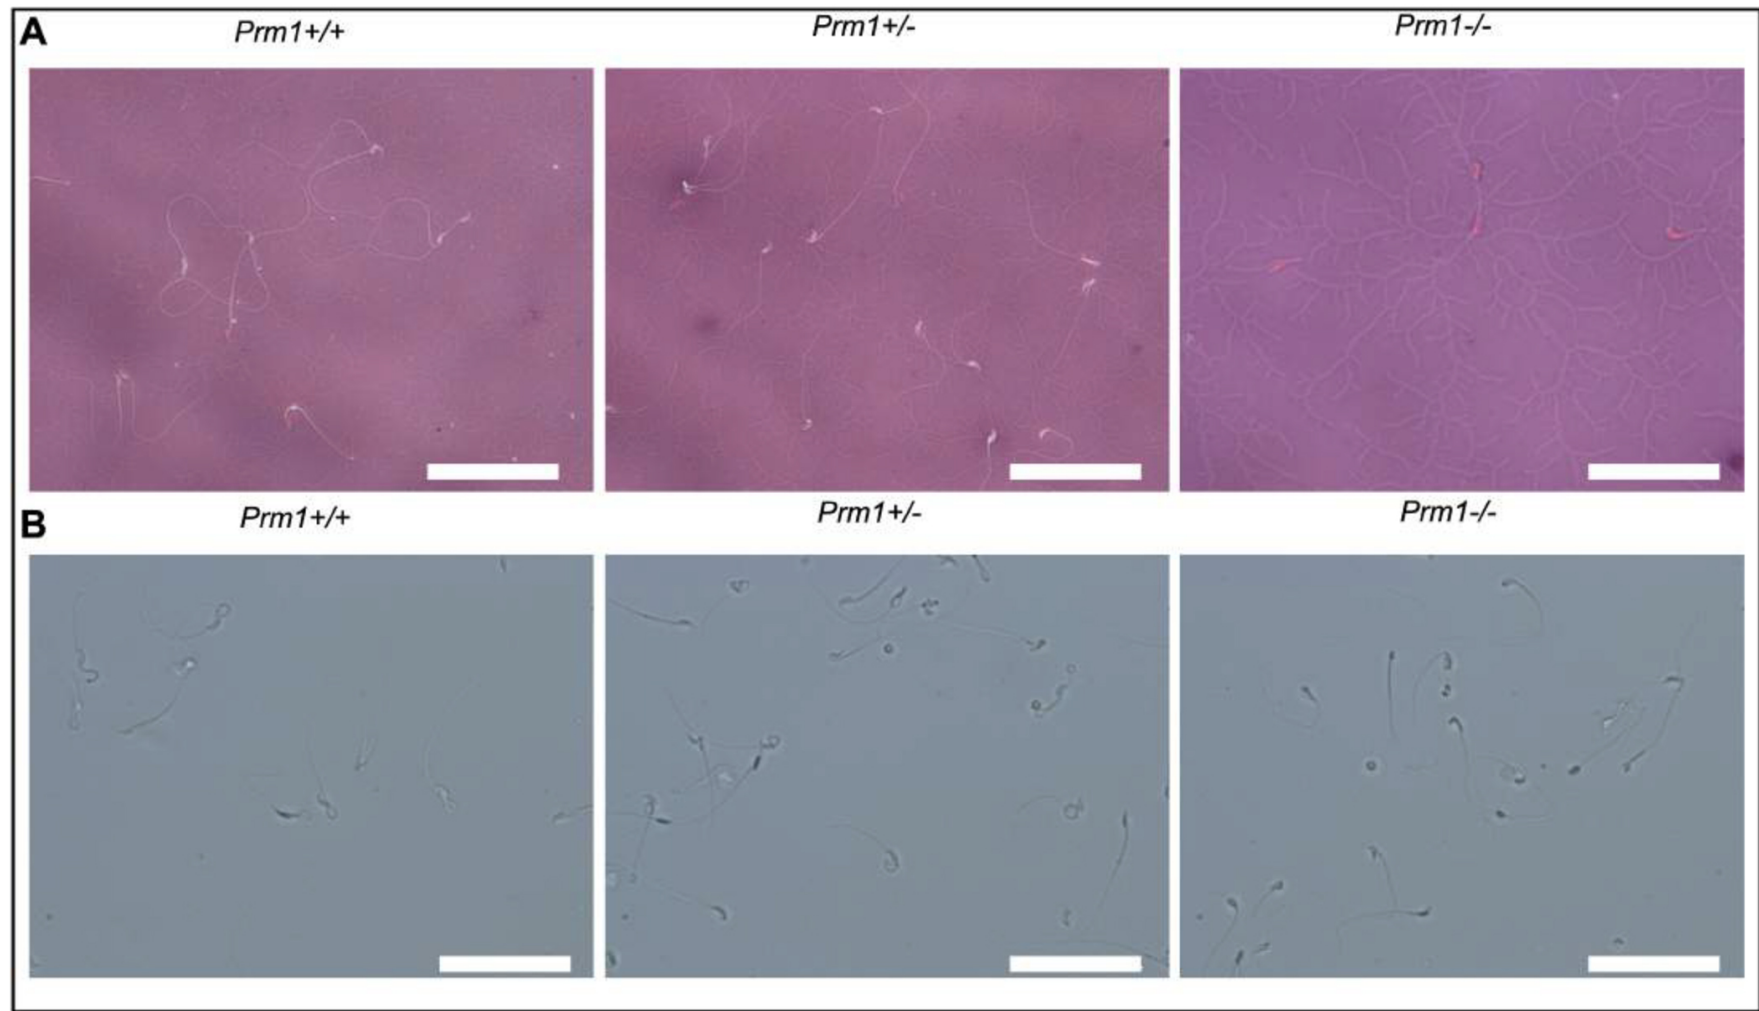

**Fig. S4. Membrane damages of *Prm1*-deficient sperm.** (a) Representative pictures of Eosin-Nigrosin staining of *Prm1*+/+, *Prm1*+/- and *Prm1*-/- sperm. Scale: 50  $\mu$ m (b) Representative pictures of hypoosmotic swelling tests of *Prm1*+/+, *Prm1*+/- and *Prm1*-/- sperm. Scale: 50  $\mu$ m

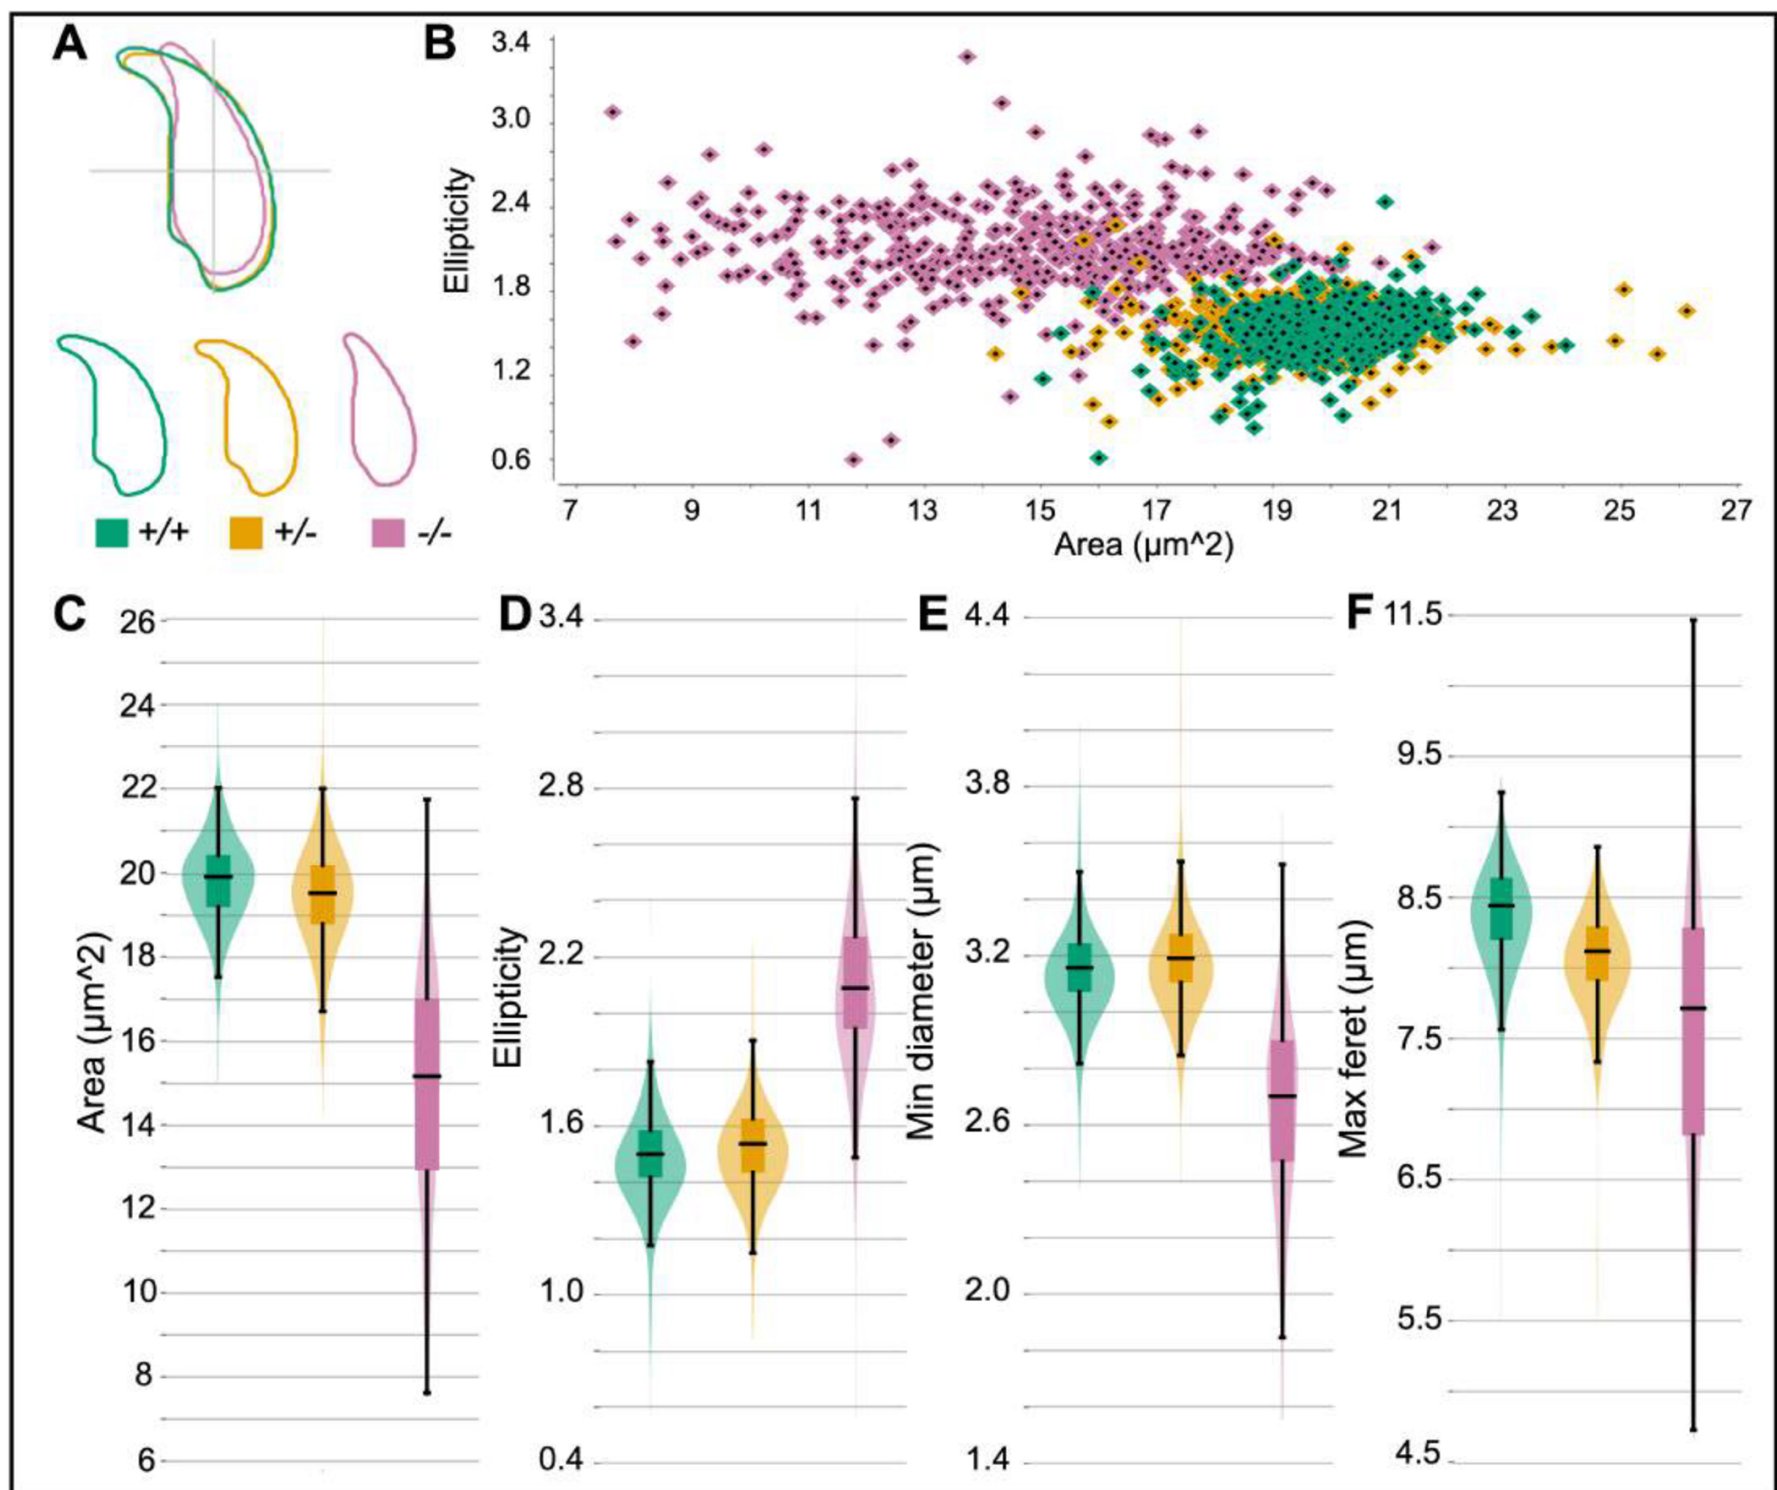

**Fig. S5. Nuclear head morphology analysis of epididymal *Prm1*-deficient sperm.** (A) Consensus head shapes for epididymal sperm from *Prm1*<sup>+/+</sup>, *Prm1*<sup>+/-</sup> and *Prm1*<sup>-/-</sup> animals are depicted. (B) Scatter plot depicting the sperm head shapes of *Prm1*<sup>+/+</sup>, *Prm1*<sup>+/-</sup> and *Prm1*<sup>-/-</sup> mice by area ( $\mu\text{m}^2$ ) and ellipticity (bonding height/bonding width). (C) Violin plot presenting the mean area ( $\mu\text{m}^2$ ) of *Prm1*<sup>+/+</sup>, *Prm1*<sup>+/-</sup> and *Prm1*<sup>-/-</sup> sperm heads. (D) Violin plot showing the mean ellipticity (bonding height/bonding width) of *Prm1*<sup>+/+</sup>, *Prm1*<sup>+/-</sup> and *Prm1*<sup>-/-</sup> sperm heads. (E) Violin plot showing the mean minimum diameter ( $\mu\text{m}$ ) of *Prm1*<sup>+/+</sup>, *Prm1*<sup>+/-</sup> and *Prm1*<sup>-/-</sup> sperm heads. (F) Violin plot depicting the mean maximum ferret ( $\mu\text{m}$ ) of *Prm1*<sup>+/+</sup>, *Prm1*<sup>+/-</sup> and *Prm1*<sup>-/-</sup> sperm heads.

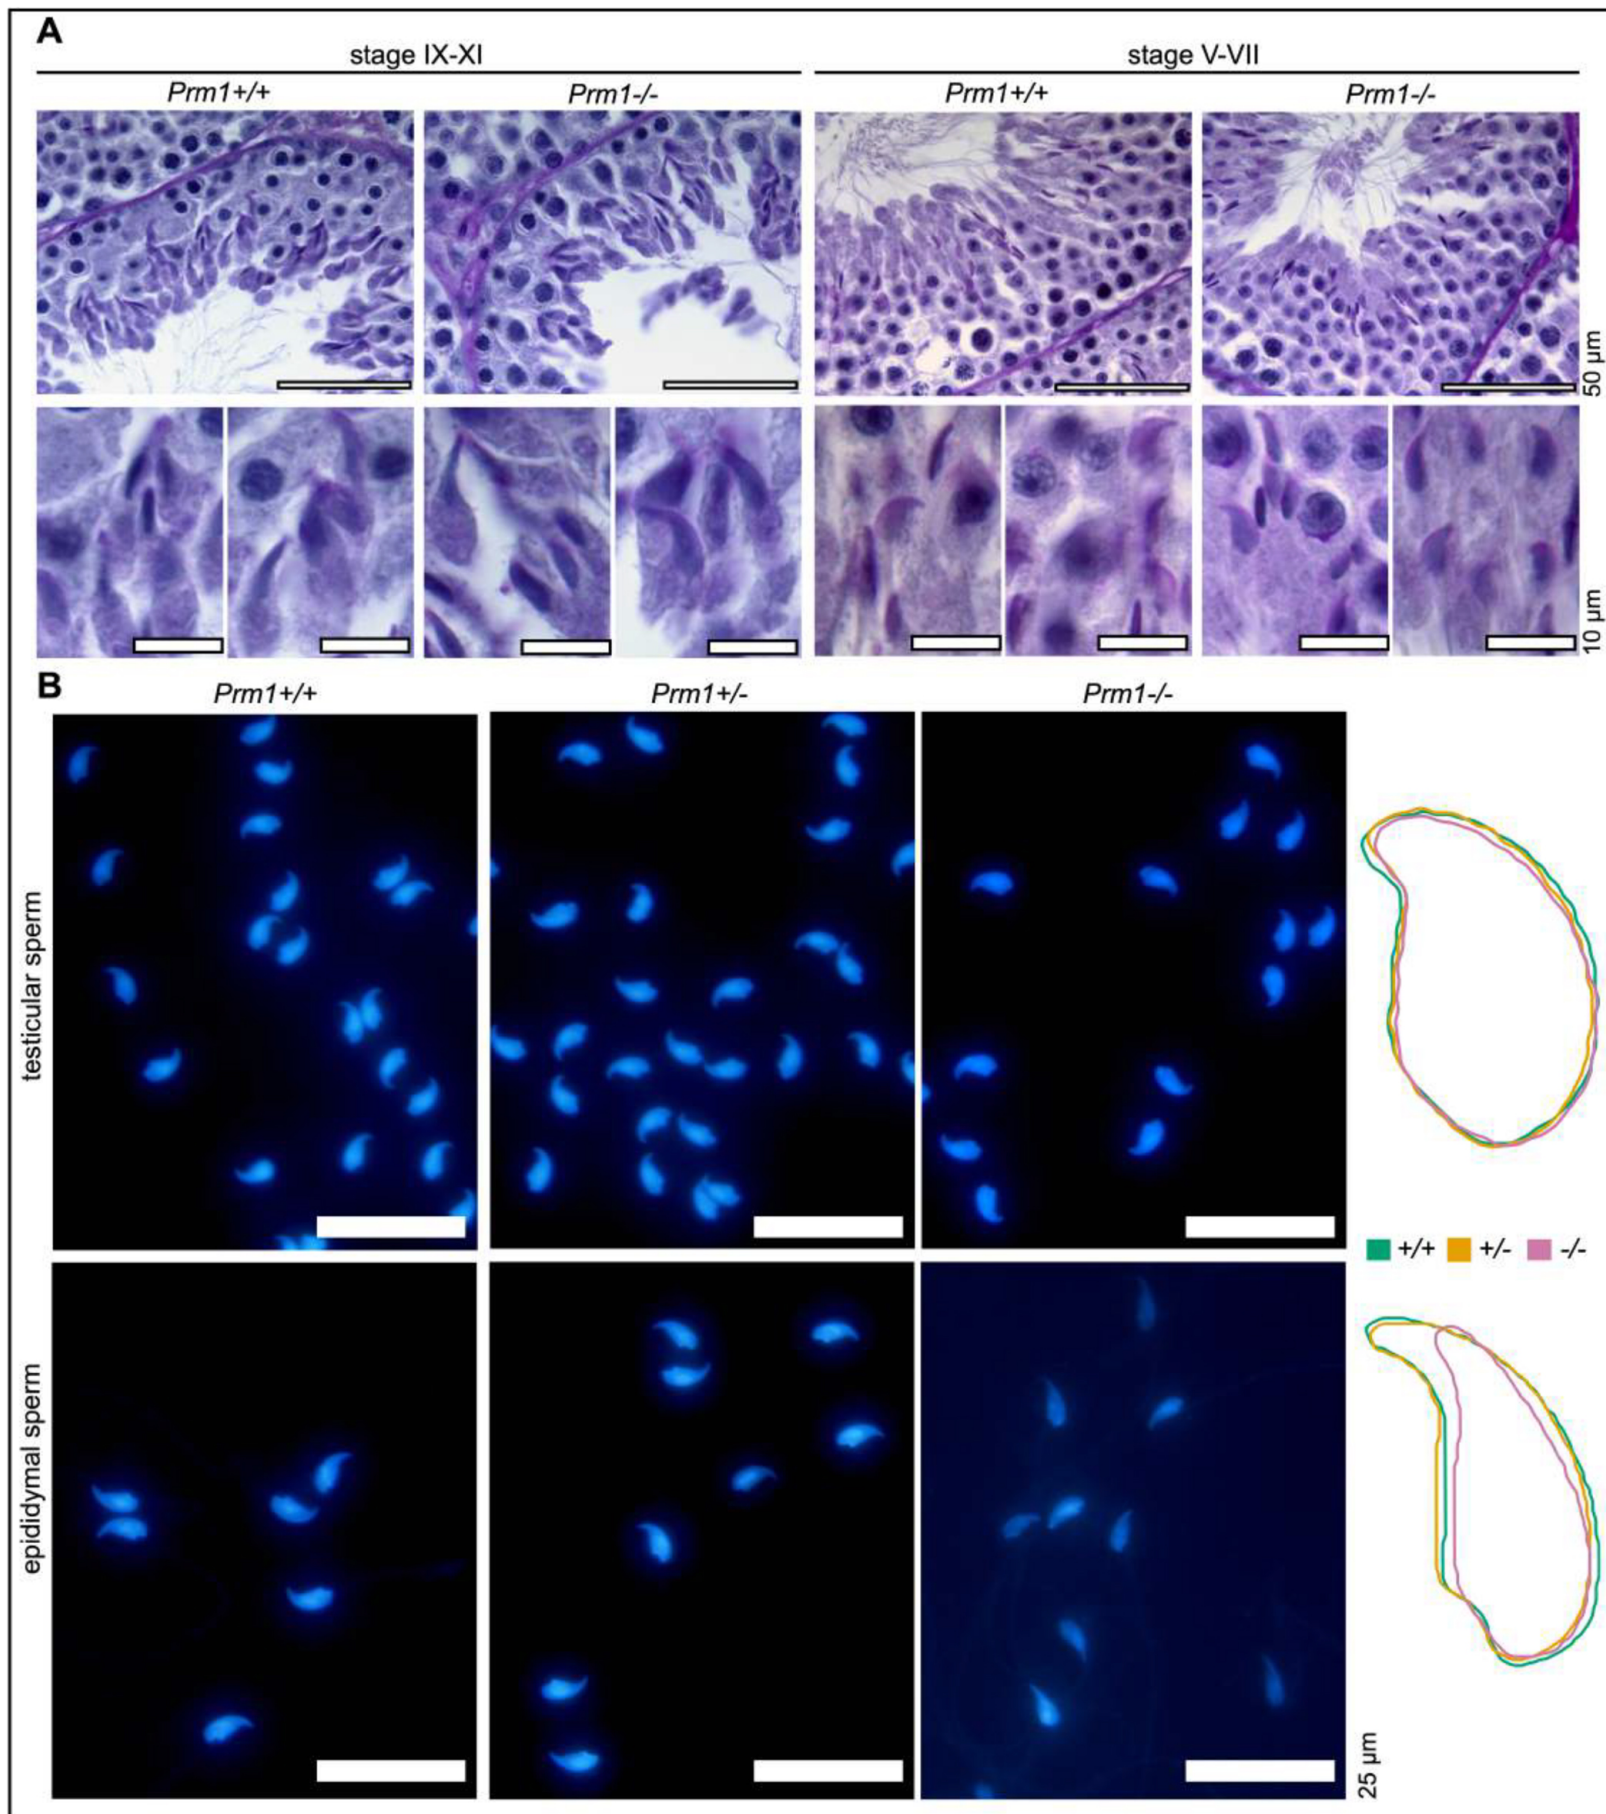

**Fig. S6. Head shape analysis of *Prm1*<sup>+/+</sup> and *Prm1*<sup>-/-</sup> sperm.** (A) Representative Periodic acid-Schiff stains of *Prm1*<sup>+/+</sup> and *Prm1*<sup>-/-</sup> seminiferous tubules. Scale: 50  $\mu$ m and 10  $\mu$ m. (B) DAPI-stained fixed testicular and cauda epididymal sperm from *Prm1*<sup>+/+</sup>, *Prm1*<sup>+/-</sup> and *Prm1*<sup>-/-</sup> mice. Scale: 25  $\mu$ m. The consensus shape for each population analysed is depicted.

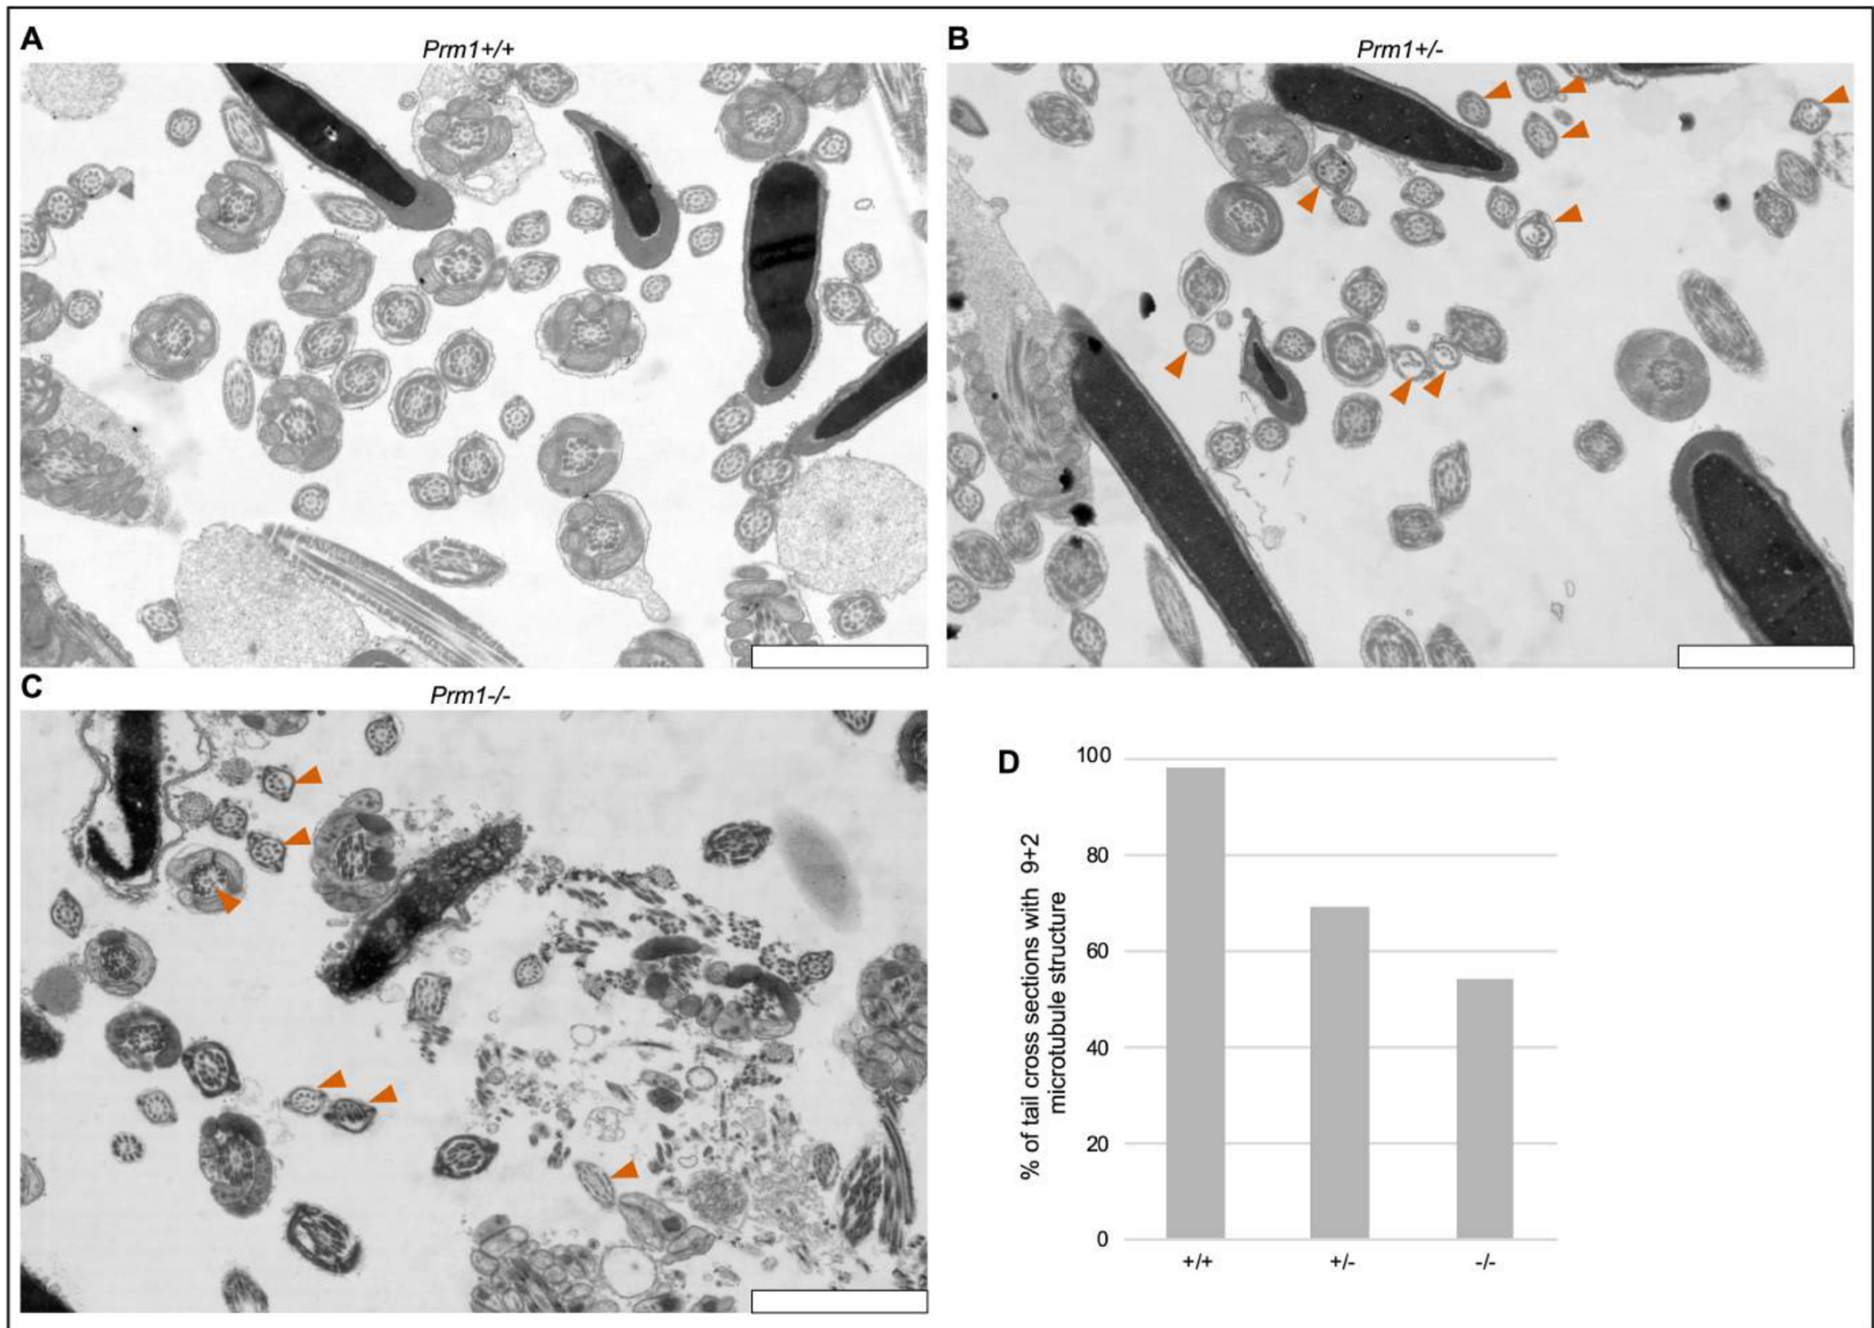

**Fig. S7. Sperm flagellar structure of *Prm1*-deficient mice.** (A-C) Representative transmission electron micrographs of *Prm1*<sup>+/+</sup>, *Prm1*<sup>+/-</sup> and *Prm1*<sup>-/-</sup> epididymal sperm, respectively. Abnormal are indicated by vermilion arrow heads. Scale: 2  $\mu$ m. (D) Quantification of sperm flagella crosssections with correct 9+2 microtubule structure of *Prm1*<sup>+/+</sup>, *Prm1*<sup>+/-</sup> and *Prm1*<sup>-/-</sup> mice. A minimum of 400 tail cross sections per genotype were counted.

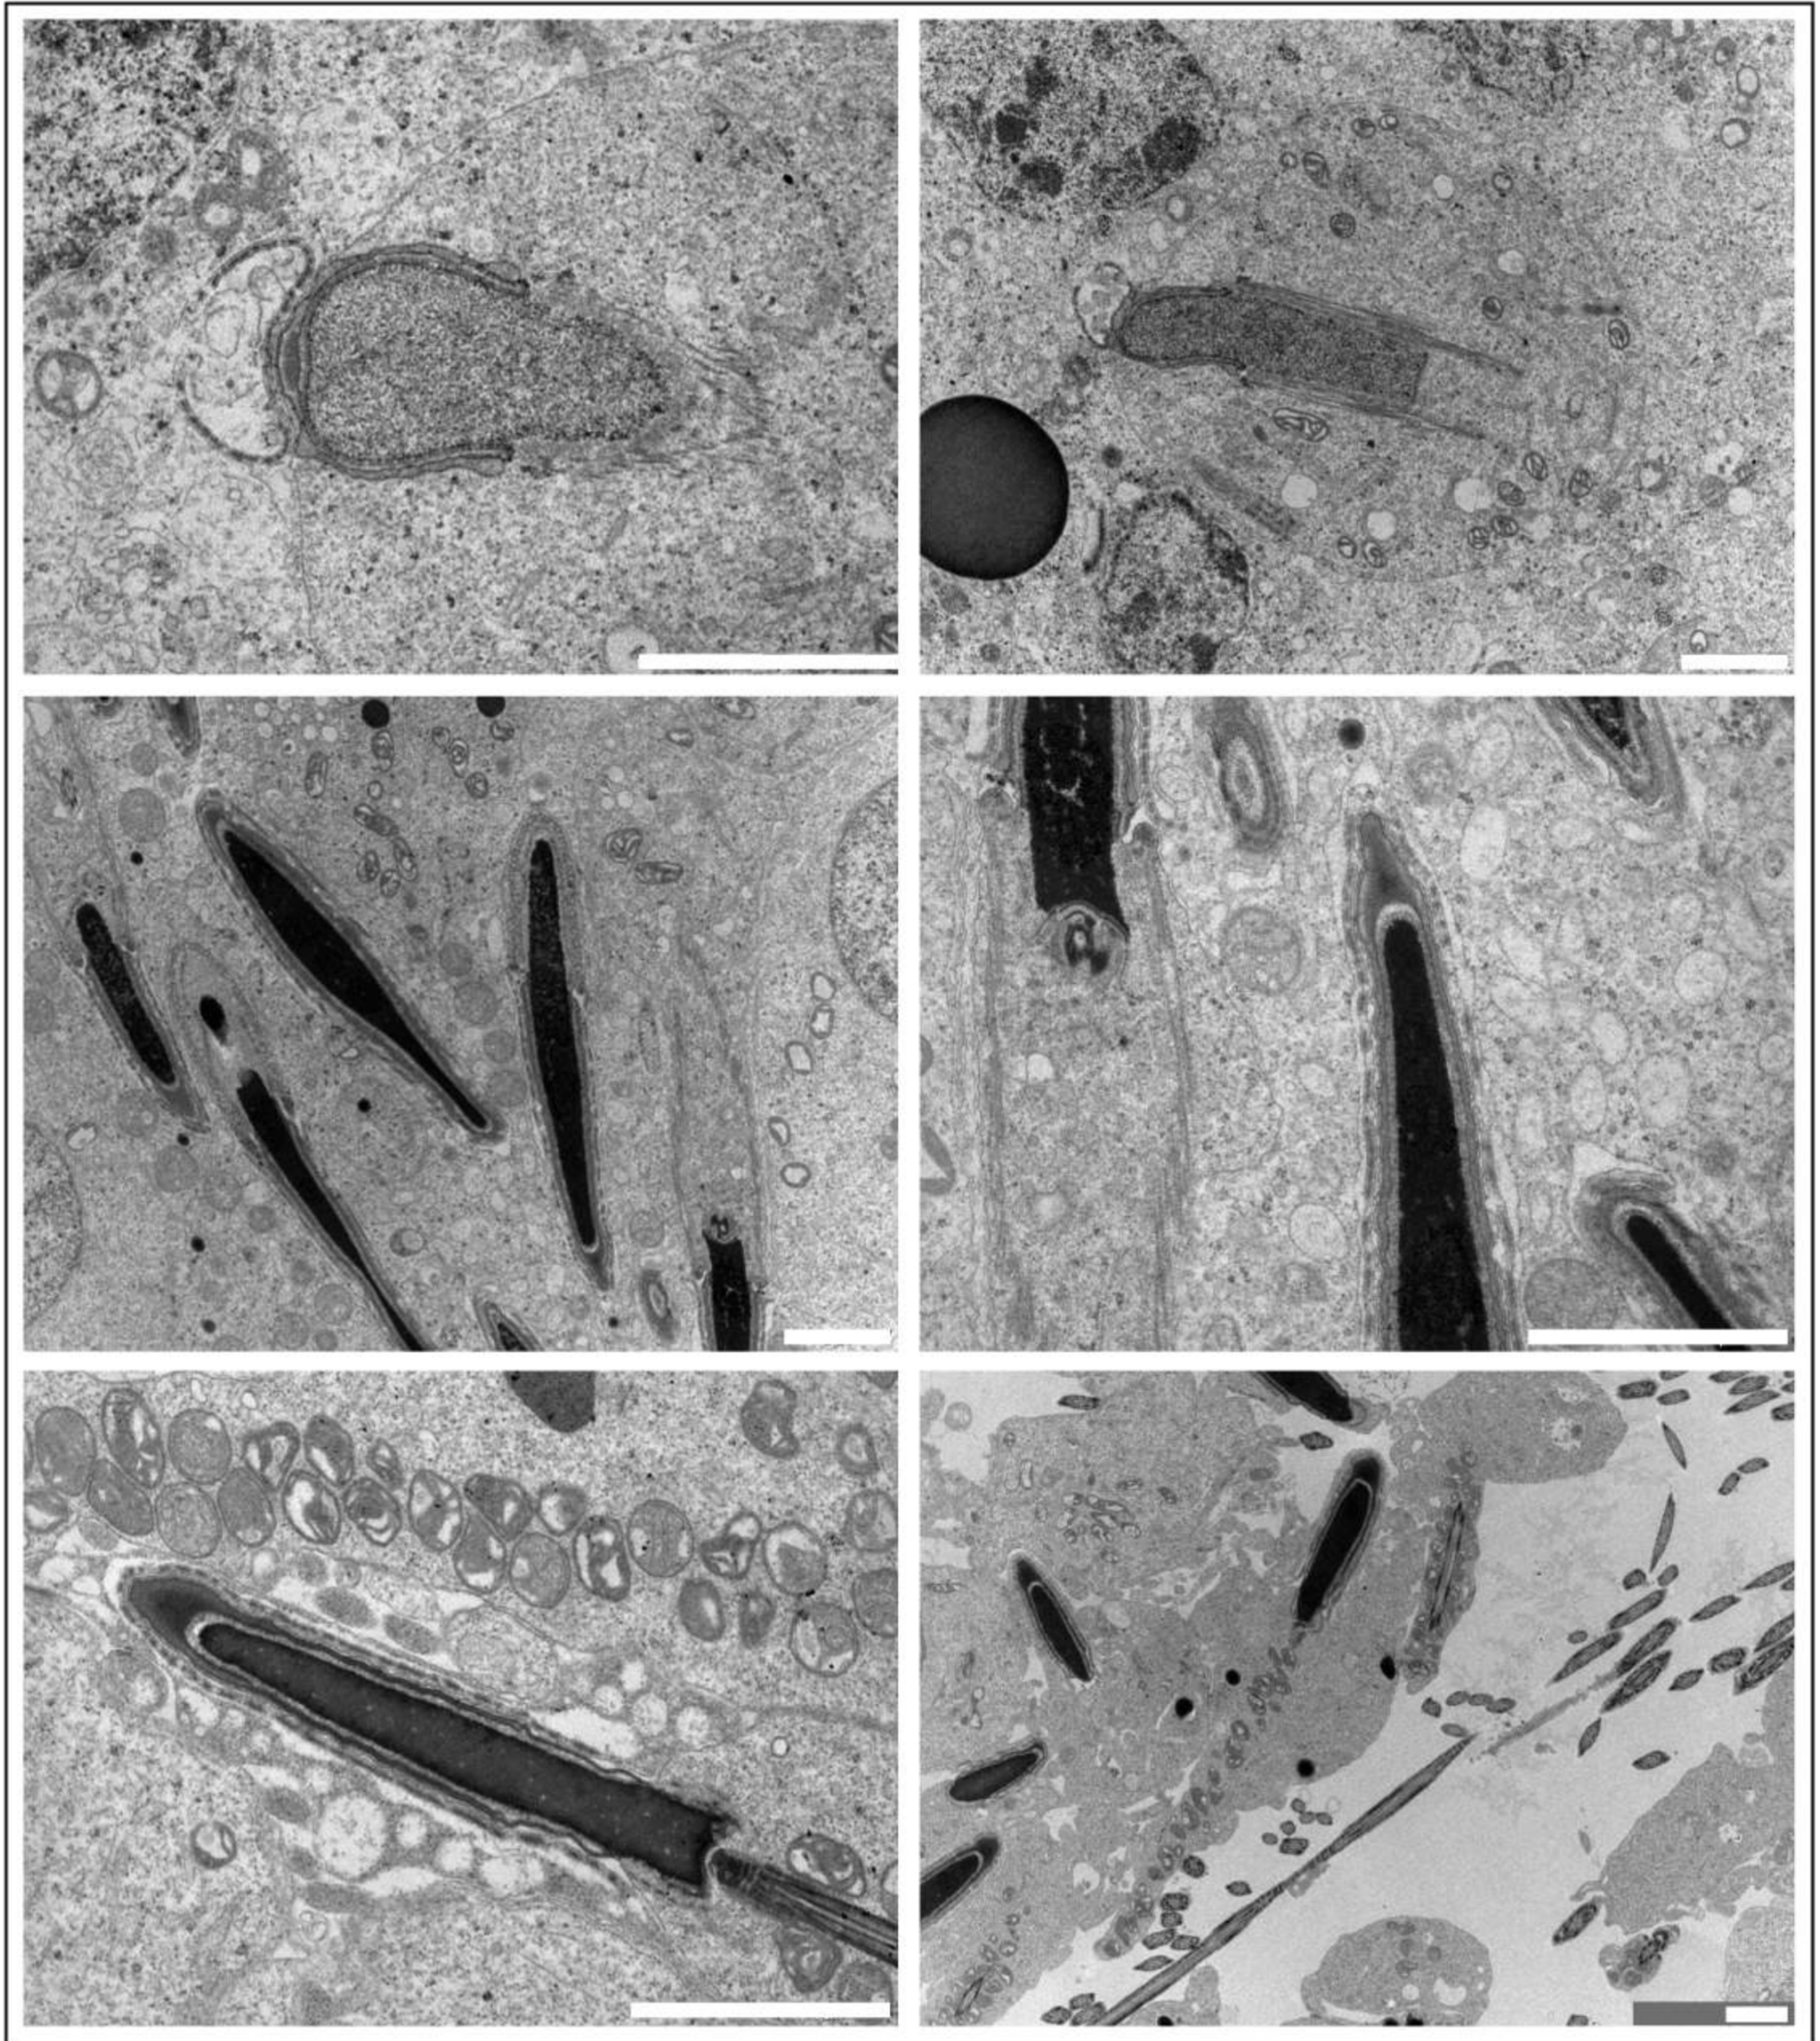

**Fig. S8.** Transmission electron micrographs of *Prm1*<sup>-/-</sup> testis. Representative micrographs of *Prm1*<sup>-/-</sup> seminiferous tubule tissue. Scale: 2  $\mu$ m.



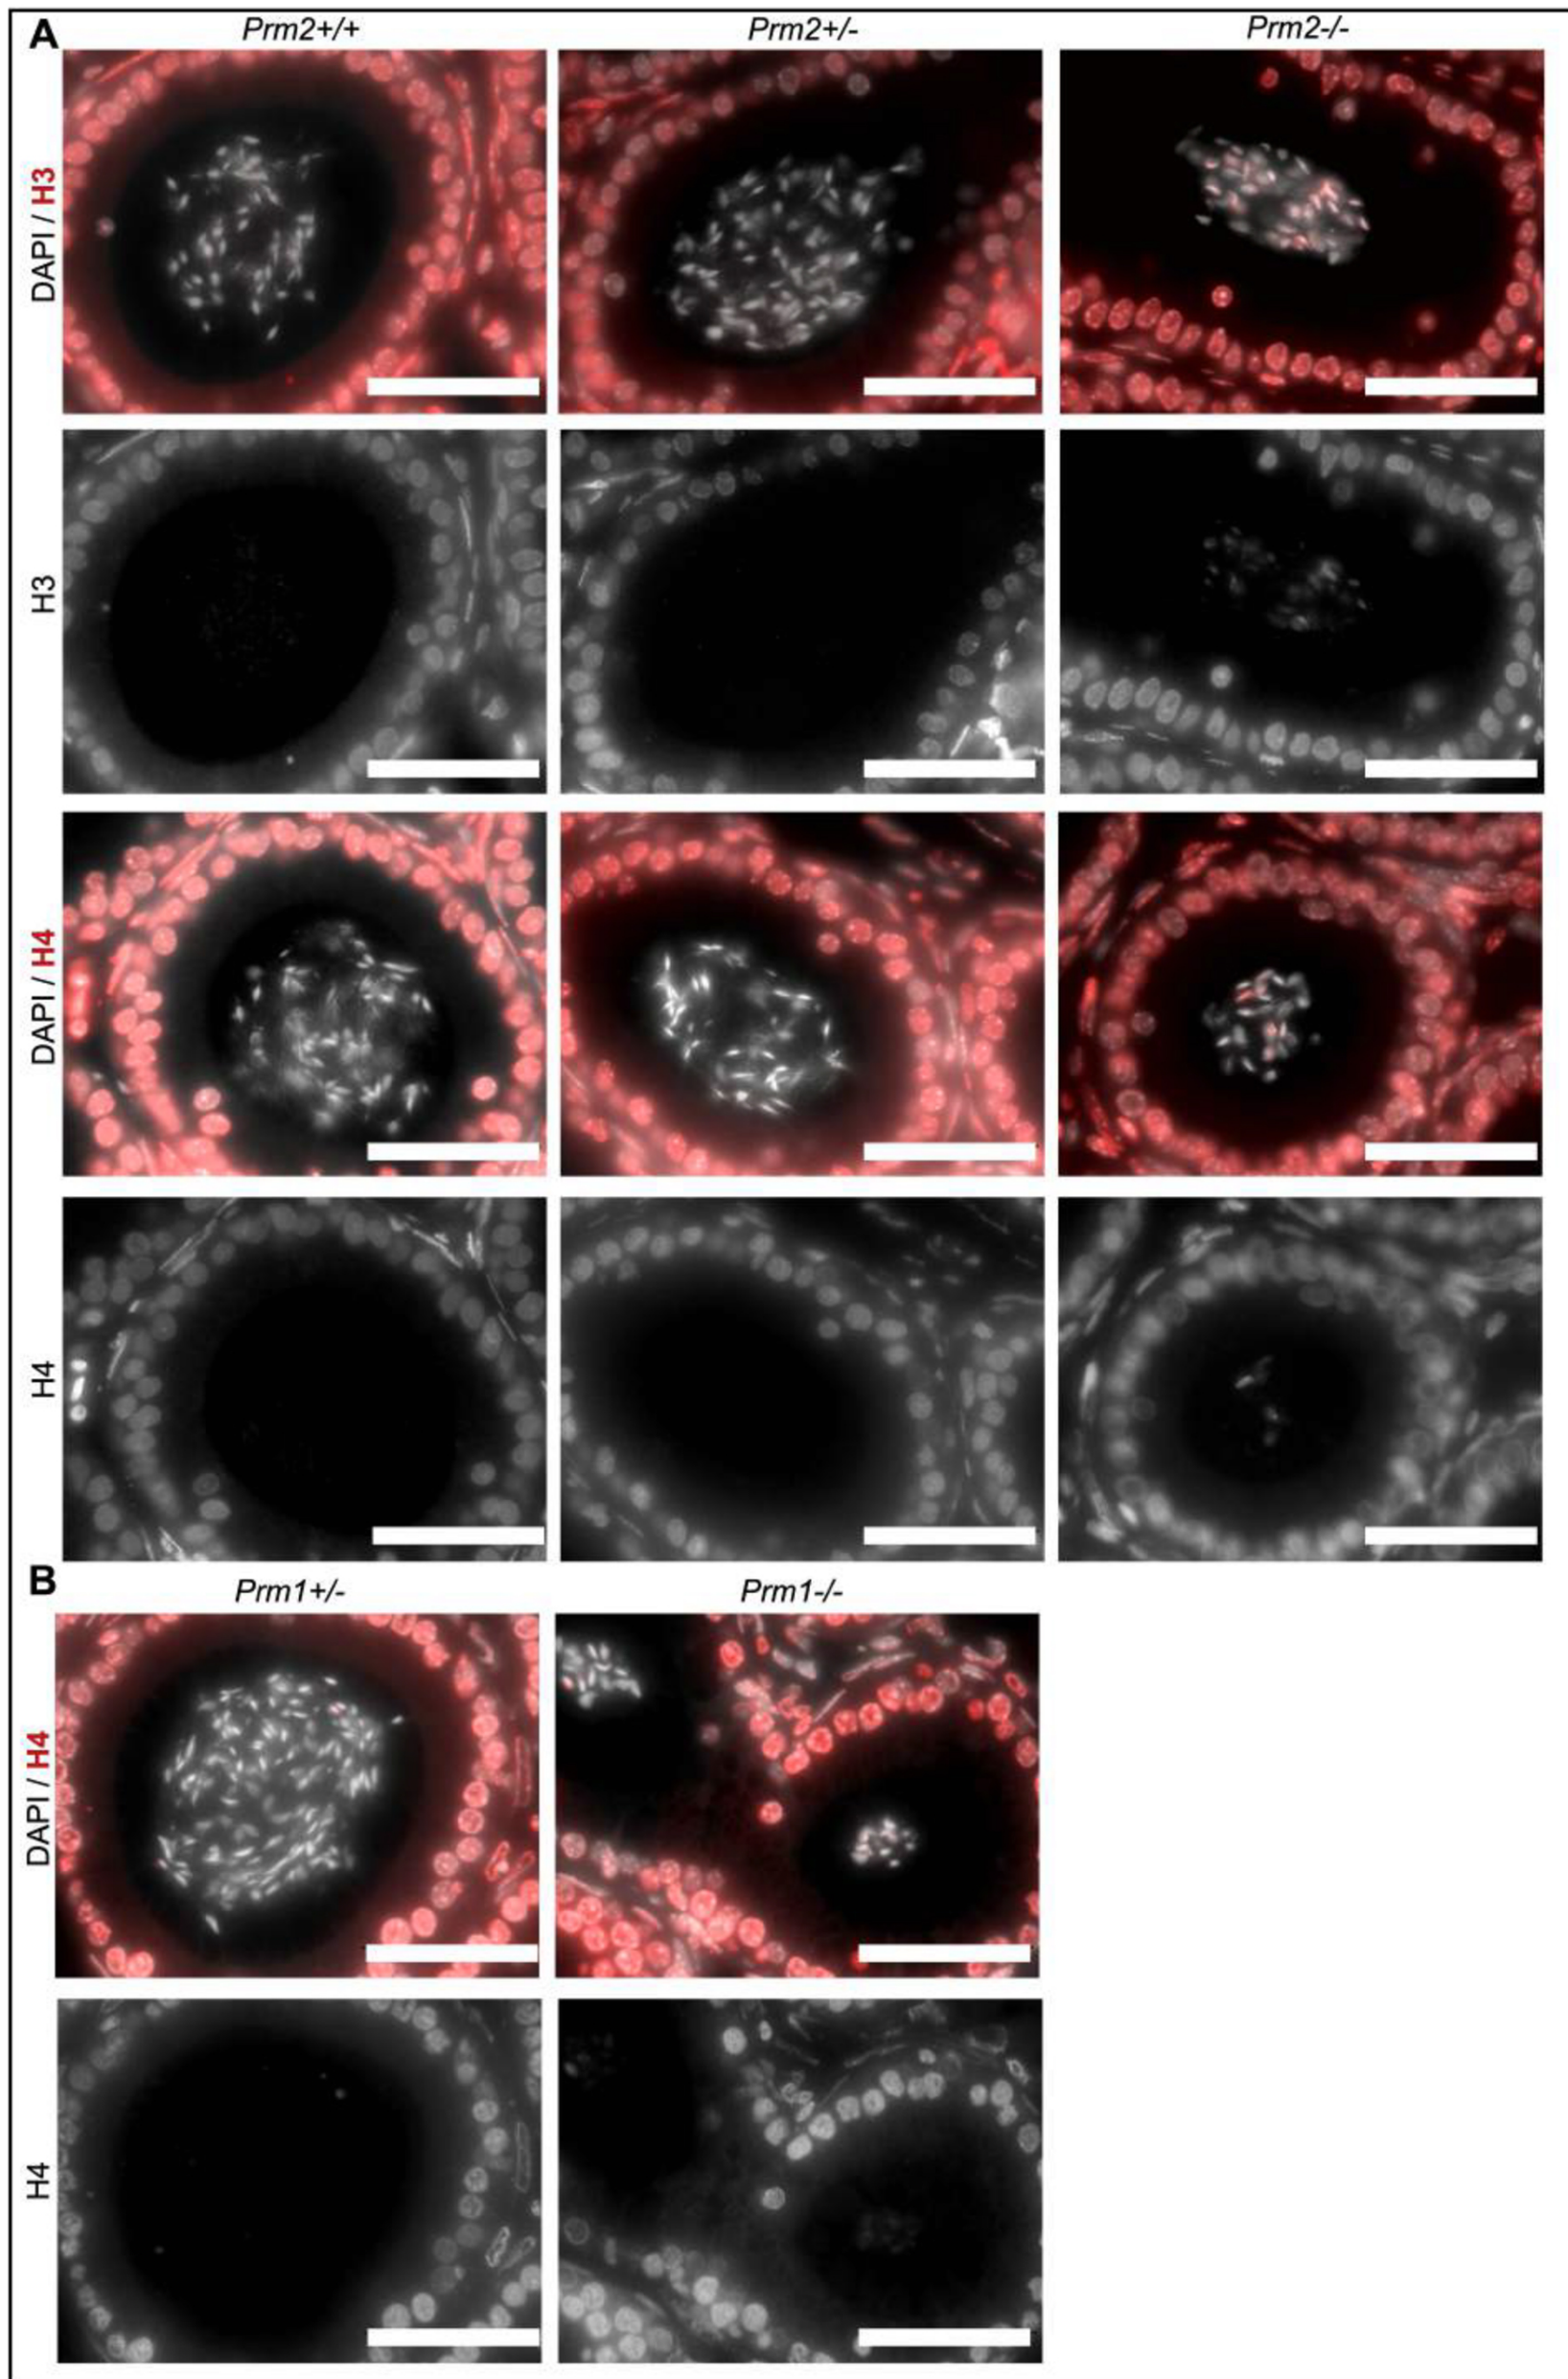

**Fig. S9. Immunohistochemical stainings against Histones H3 and H4 on caput epididymal sections.** (a) *Prm2*<sup>+/+</sup>, *Prm2*<sup>+/-</sup>, *Prm2*<sup>-/-</sup> sections stained against H3 and H4. (b) *Prm1*<sup>+/-</sup> and *Prm1*<sup>-/-</sup> sections stained against H4. Antibody stainings (red) were counterstained with DAPI (grey) and are shown additionally as grey single channel pictures. Scale: 50  $\mu$ m.

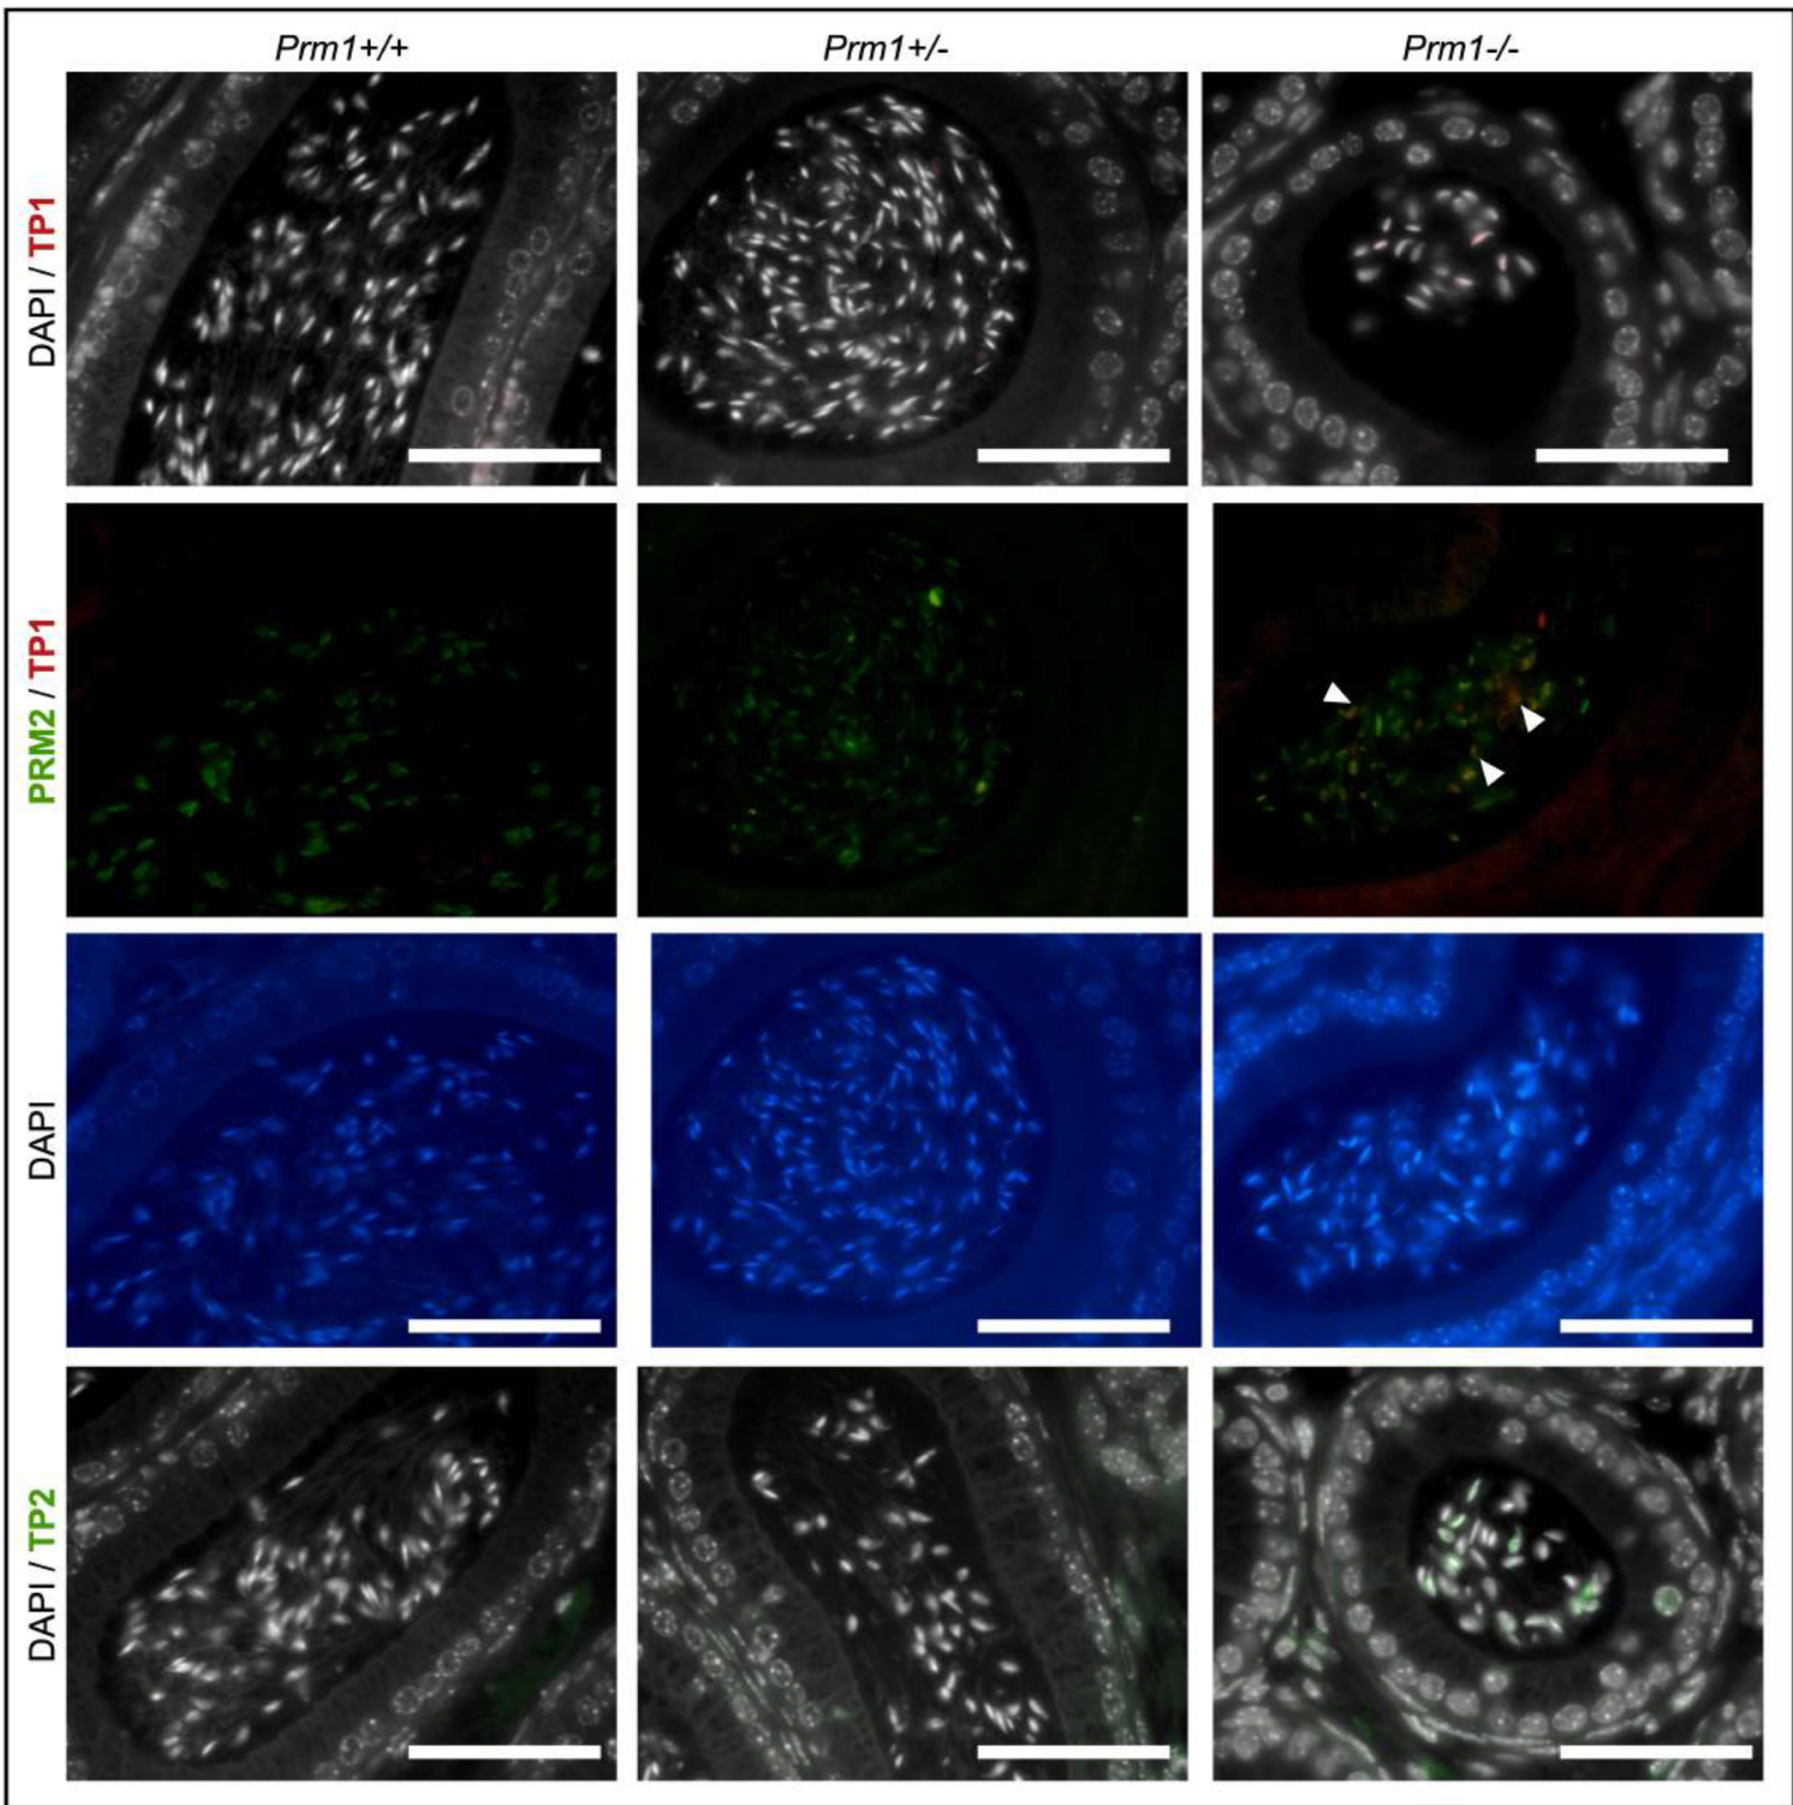

**Fig. S10. Representative immunofluorescent staining against TNP1, TNP2 and PRM2.** Caput epididymis tissue sections from *Prm1*<sup>+/+</sup>, *Prm1*<sup>+/-</sup> and *Prm1*<sup>-/-</sup> males are shown. Examples of PRM2-TP1 double positive sperm are indicated with white arrow heads. Scale: 50  $\mu$ m

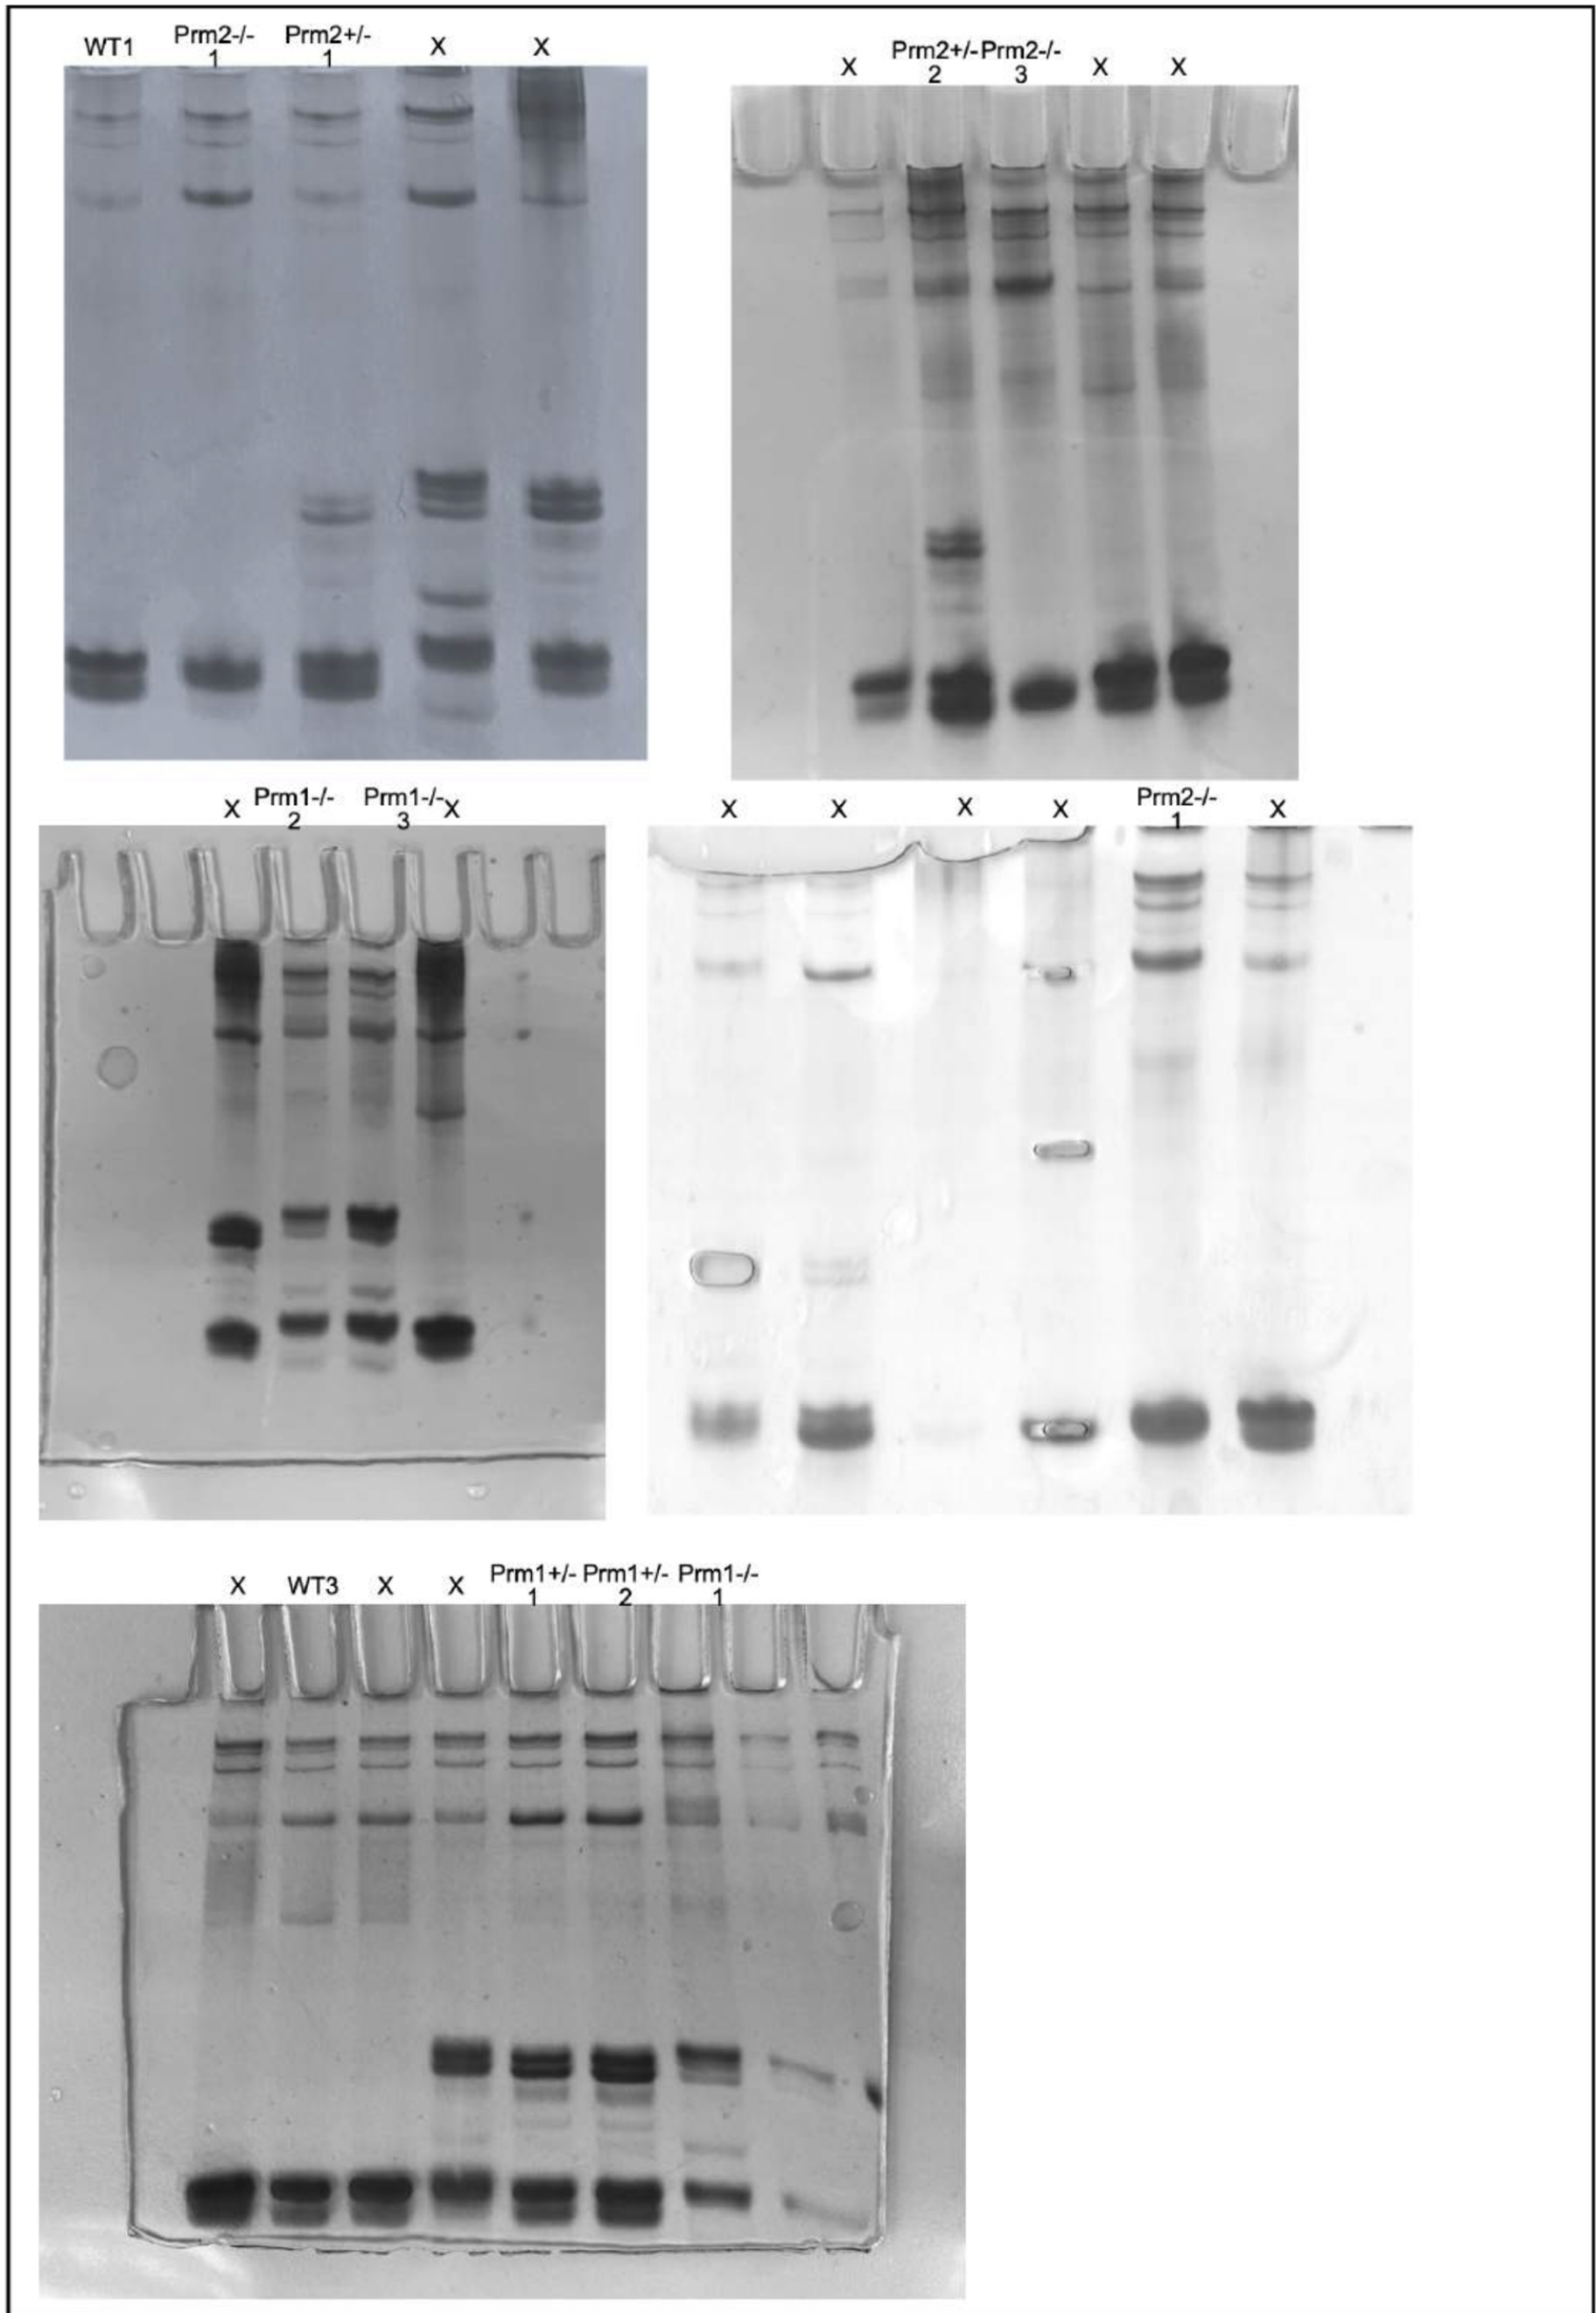

**Fig. S11. Acid-urea gels used for band area quantification.** Lanes marked with X where not used or part of other studies.

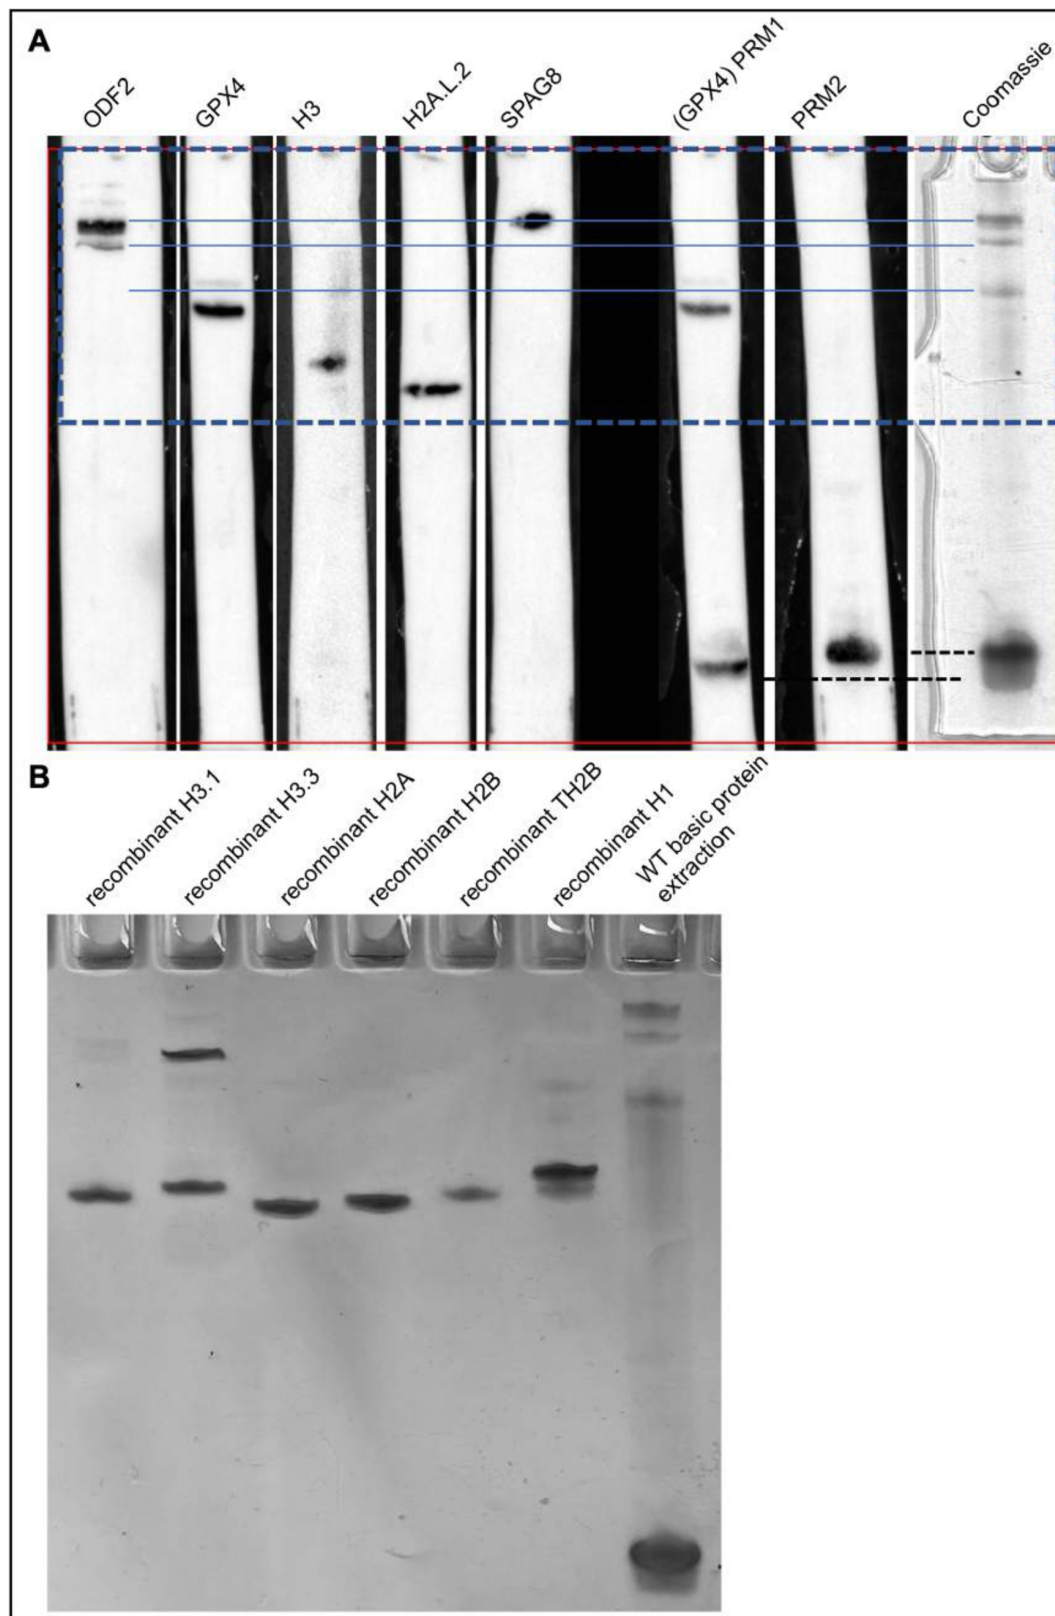

**Fig. S12. Identification of proteins isolated from WT sperm for AU-PAGE.** (A) Lanes of AU-PAGE gel were loaded with equal amounts (1 million sperm) of nuclear-enriched proteins from pooled WT samples. One lane was fixed and stained with Coomassie, the others were blotted and used for Western Blots. ODF2, GPX4, H3, H2AL2, SPAG8 and both protamines were identified. (B) Fixed and Coomassie-stained AU-PAGE gel loaded with equal amounts of recombinant human histone variants. Nuclear-enriched proteins from sperm of pooled murine WT samples were loaded for orientation.

**Table S1.** Fertility data Prm1-deficient male mice

| genotype | male # | plugs collected | litters born | litter size 1 | litter size 2 | litter size 3 | litter size 4 | litter size 5 | litter size 6 |
|----------|--------|-----------------|--------------|---------------|---------------|---------------|---------------|---------------|---------------|
| +/+      | 1      | 7               | 6            | 9             | 5             | 9             | 7             | 8             | 5             |
|          | 2      | 5               | 5            | 9             | 9             | 3             | 9             | 8             |               |
|          | 3      | 5               | 5            | 8             | 3             | 8             | 8             | 8             |               |
|          | 4      | 5               | 5            | 8             | 4             | 8             | 6             | 8             |               |
|          | 5      | 5               | 5            | 13            | 8             | 5             | 6             | 9             |               |
|          | 6      | 5               | 5            | 9             | 1             | 8             | 2             | 5             |               |
|          | 7      | 5               | 5            | 7             | 8             | 8             | 7             | 4             |               |
|          | 8      | 5               | 4            | 5             | 8             | 6             | 11            |               |               |
| +/-      | 1      | 5               | 4            | 8             | 5             | 5             | 5             |               |               |
|          | 2      | 6               | 4            | 6             | 10            | 1             | 6             |               |               |
|          | 3      | 5               | 2            | 1             | 2             |               |               |               |               |
|          | 4      | 5               | 2            | 1             | 2             |               |               |               |               |
|          | 5      | 5               | 2            | 2             | 8             |               |               |               |               |
|          | 6      | 5               | 2            | 2             | 1             |               |               |               |               |
|          | 7      | 5               | 1            | 1             |               |               |               |               |               |
|          | 8      | 5               | 1            | 1             |               |               |               |               |               |
| -/-      | 1      | 5               | 0            |               |               |               |               |               |               |
|          | 2      | 5               | 0            |               |               |               |               |               |               |
|          | 3      | 5               | 0            |               |               |               |               |               |               |
|          | 4      | 5               | 0            |               |               |               |               |               |               |
|          | 5      | 5               | 0            |               |               |               |               |               |               |
|          | 6      | 5               | 0            |               |               |               |               |               |               |
|          | 7      | 5               | 0            |               |               |               |               |               |               |
|          | 8      | 5               | 0            |               |               |               |               |               |               |
|          | 9      | 5               | 0            |               |               |               |               |               |               |

**Table S2. RNA-sequencing data of testis from Prm1-deficient mice**

[Click here to download Table S2](#)

**Table S3. MassSpec data of sperm from Prm1-deficient mice**

[Click here to download Table S3](#)
